# Supplementary material
Source: PubMed Central journal article supplement (PMC7610478)
Supplement: EMS118931-supplement-Supplementary_Materials.pdf [file EMS118931-supplement-Supplementary_Materials.pdf]

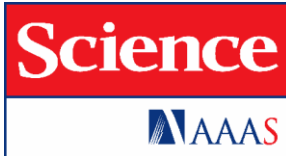

## Supplementary Materials for

### **Cholangiocyte organoids can repair bile ducts after transplantation in the human liver**

Fotios Sampaziotis\*, Daniele Muraro, Olivia C. Tysoe, Stephen Sawiak, Timothy E. Beach, Edmund M. Godfrey, Sara S. Upponi, Teresa Brevini, Brandon T. Wesley, Jose Garcia-Bernardo, Krishnaa Mahbubani, Giovanni Canu, Richard Gieseck III, Natalie L. Berntsen, Victoria L. Mulcahy, Keziah Crick, Corrina Fear, Sharayne Robinson, Lisa Swift, Laure Gambardella, Johannes Bargehr, Daniel Ortmann, Stephanie E. Brown, Anna Osnato, Michael P. Murphy, Gareth Corbett, William T. H. Gelson, George F. Mells, Peter Humphreys, Susan E. Davies, Irum Amin, Paul Gibbs, Sanjay Sinha, Sarah A. Teichmann, Andrew J. Butler, Teik Choon See, Espen Melum, Christopher J. E. Watson, Kourosh Saeb-Parsy†, Ludovic Vallier\*†

\*Corresponding author. Email: fs347@cam.ac.uk (F.S.); lv225@cam.ac.uk (L.V.)

†These authors contributed equally to this work.

Published 19 February 2021, *Science* **371**, 839 (2021)  
DOI: 10.1126/science.aaz6964

#### **This PDF file includes:**

Materials and Methods  
Figs. S1 to S16  
Tables S1 to S3  
Captions for Movies S1 to S9  
Captions for Data S1 to S3  
References

#### **Other Supplementary Material for this manuscript includes the following:**

(available at [science.sciencemag.org/content/371/6531/839/suppl/DC1](https://science.sciencemag.org/content/371/6531/839/suppl/DC1))

Movies S1 to S6, S8, and S9 (.mp4)  
Movie S7 (.mov)  
Data S1 to S3 (.xlsx)

1 **Other Supplementary Materials for this manuscript include the following:**

2  
3 Movies S1 to S9

4 Movie S1: Movie S1 Carrier1 T1.mp4

5 Movie S2: Movie S2 Carrier1 T2.mp4

6 Movie S3: Movie S3 Cells1 T1.mp4

7 Movie S4: Movie S4 Cells1 T2.mp4

8 Movie S5: Movie S5 MR 3D reconstruction Carrier.mp4

9 Movie S6: Movie S6 MR 3D reconstruction Cells.mp4

10 Movie S7: Movie S7 Z-stack KRT19(GREEN)-RFP(RED).avi

11 Movie S8: Movie S8 3D reconstruction KRT19(GREEN)-RFP(RED).mp4

12 Movie S9: Movie S9 3D rendering KRT19(GREEN)-RFP(RED).mp4

13  
14 Data S1 to S3

15 Data S1: Data S1 Differentially Expressed Genes in Primary Cholangiocytes.xlsx

16 Data S2: Data S2 Differentially Expressed Genes in Pseudotime.xlsx

17 Data S3: Data S2 Differentially Expressed Genes between organoids and primary  
18 cholangiocytes.xlsx

19

## 1 **Materials and Methods**

### 3 Ethical approval

4 Gallbladder, bile duct, liver biopsy and bile samples were obtained from deceased organ  
5 donors (National Research Ethics Committee East of England – Cambridge South 15/EE/0152).  
6 Human livers retrieved for transplantation but subsequently declined were used for ex vivo  
7 administration of cholangiocytes (National Research Ethics Committee East of England –  
8 Cambridge East 14/EE/0137). All human tissue was used after obtaining informed consent for use  
9 in research.

### 11 Tissue collection

12 Gallbladder, bile duct, liver biopsies and bile were obtained under sterile conditions from  
13 deceased transplant organ donors as rapidly as possible after cessation of circulation. Tissue  
14 samples, and liver retrieved for transplantation but subsequently declined, were transferred to the  
15 laboratory at 4°C in University of Wisconsin (UW®) organ presentation solution.

### 17 Tissue dissociation

18 Resected tissue (gallbladder, extrahepatic ducts and liver) was transferred to the lab as  
19 described above and processed immediately after resection. Gallbladder and extrahepatic bile duct  
20 samples were drained of bile and the organ lumen was exposed through a longitudinal incision.  
21 Liver samples were divided into 1cm<sup>2</sup> cubes prior to processing. All samples were washed twice  
22 with warm PBS with Ca<sup>2+</sup>Mg<sup>2+</sup> +EDTA (0.5mM), followed by enzymatic digestion with using  
23 Liberase (0.2 Wünsch/ml) in an incubated shaker at 37°C and 200 RPM for 30 minutes. DNase I  
24 (2000 U/ml) was added to the solution to prevent cell clumping and increase viability. Liver  
25 samples were dissociated further using the Miltenyi Biotec GentleMACS tissue dissociator and  
26 GentleMacs Tissue Dissociation C Tubes. For the gallbladder and extrahepatic duct samples,  
27 gentle mechanical scrapping of the lumen was adequate to release the epithelial cells following  
28 enzymatic digestion. All cell suspensions were filtered through 70um filters to remove debris and  
29 remaining tissue, washed with PBS containing 1% BSA (W/V) and centrifuged at 400g, for 5mins  
30 in a refrigerated centrifuge maintaining a temperature of 4°C. The cells were resuspended in  
31 Miltenyi Biotec red blood cell (RBC) lysis and incubated for 10 minutes at room temperature (RT).  
32 The Miltenyi Biotec Debris Removal solution kit was used according to the manufacturer's  
33 instructions to remove remaining debris and dead cells. For liver samples, the resulting cell  
34 suspensions were centrifuged at 50g for 5 minutes (4°C) to pellet the hepatocyte fraction, the  
35 supernatant was collected and cholangiocytes were isolated as described below.

### 37 Cell isolation

38 Following tissue dissociation to single cells, cholangiocytes were isolated with Magnetic  
39 Associated Cell Sorting (MACS) using the Miltenyi Biotec autoMACS Pro separator and CD326  
40 (EpCAM) MicroBeads according to the manufacturer's instructions. The resulting cells were  
41 counted, centrifuged at 444g for 5 minutes, resuspended to a concentration of 1000 cells/ µL and  
42 stored on ice.

### 44 10x Single Cell Library Making Process

45 GEM-RTs (Gel-beads-in-emulsion which barcode the poly adenylated mRNAs, followed by  
46 Reverse Transcription) were broken and Silane magnetic beads are used to purify first stand cDNA

1 from the GEM-RT mixture and the cDNA was then amplified via PCR. Enzymatic fragmentation,  
2 end-repair and A-tailing were followed by size selection (using SPRISelect reagent). An adapter  
3 was ligated to the fragments and following a clean-up step, index PCR took place. After a further  
4 round of size selection with SRISelect, completed libraries were quantified, (Agilent Bioanalyser  
5 and qPCR) and diluted for running on an Illumina sequencing instrument (HS4000).

#### 6 7 Processing and normalization of 10X data

8 The results from the sequencing runs were checked manually to confirm that the overall yield  
9 and quality were as expected. The data from the instrument were converted to fastq format, the  
10 input format required by the 10X software cellranger, and aligned using the human reference  
11 GRCh36-1.2.0 available from 10X. The dataset was augmented by integrating counts of a cluster  
12 of cholangiocytes from a published dataset (cluster 17 in MacParland SA et al, 2018) (25). Cells  
13 were annotated as part of different origins, these being primary tissue (PRI), untreated organoids  
14 (ORG), treated organoids (ORGT). Each origin comprises three regions: intrahepatic duct (IHD),  
15 common bile duct (CBD), gallbladder (GB). The number of cells in each origin and region are  
16 reported in **Figure S1C**. Genes with read counts > 0 in at least 3 cells from each batch in at least  
17 one origin were maintained for downstream analysis. Low quality cells were removed based on  
18 the percentage of UMI mapping to the mitochondrial genome and the number of genes detected  
19 by determining outliers (3 median-absolute-deviations) with the routine isOutlier in the package  
20 scater (26). Cholangiocytes were isolated by retaining cells expressing at least one of the biliary  
21 markers EPCAM, KRT7, KRT19 (with number of counts > 3). Normalization, identification of  
22 highly variable genes and cell cycle regression (regressing out the difference between the G2M  
23 and S phase scores) were performed with the Seurat package (27). We employed the routine  
24 fastMNN in scran for batch correction (28). Batch corrected samples are shown in **figure 2A**.  
25 Small clusters derived by applying the Louvain method for community detection and characterized  
26 by cells which were outliers in the percentage of UMI mapping to the mitochondrial genome and  
27 the number of genes detected were filtered out.

#### 28 29 Analysis of normalized 10X data

30 The normalized data were clustered using the Louvain method in the Scanpy package (29) by  
31 selecting a resolution which generated 3 clusters and with 10 random initialisations. Similarity  
32 between Louvain clusters and origin annotations was assessed using the Adjusted Rand Index  
33 (ARI) and the Adjusted Mutual Information (AMI). Both measures lie in the interval [0,1], where  
34 a value close to 0 indicates random labelling and exactly 1 means that the two partitions are  
35 identical. The average value calculated on the different partitions obtained by random  
36 initializations was > 0.95 for both measures, indicating a high correspondence between origins and  
37 clusters (**Fig. S5A**). The same analysis performed on regions showed poor matching between  
38 regions and clusters, suggesting similarity in the transcriptional profile of cells located in different  
39 regions (**Fig. S5A-B**). Transcriptional similarity was quantified at origin and region resolution by  
40 estimating the connectivity of data manifold partitions within the partition-based graph abstraction  
41 (PAGA) framework. At the origin resolution, this analysis notably highlighted higher  
42 transcriptional similarity between treated organoids and primary tissue than between untreated  
43 organoids and primary tissue (**Fig. S9B**). Interestingly, at the region resolution we identified higher  
44 transcriptional similarity between adjacent locations in primary tissues, with intrahepatic duct and  
45 gallbladder having the lowest connectivity value. This association between connectivity and  
46 anatomical location, together with the similarity of cells located in different regions, suggested a

1 gradual variation in the transcriptional profile of cells in primary tissue that could be represented  
2 as a pseudo-spatial dimension. In this view, we analyzed the primary tissue by applying two  
3 methods for pseudo-temporal (or pseudo-spatial) ordering: diffusion pseudo-time (30) and  
4 Monocle 2 (31). In Monocle 2 differential expression in pseudotime was calculated using the  
5 differential GeneTest routine. Both methods confirmed an association between transcriptional  
6 similarity and anatomical location, as highlighted by the density plot in **Figure S4B** and allowed  
7 the representation of regional markers along a pseudo-spatial dimension (**Fig. S4C**). Since the  
8 majority of cells had a diffusion pseudotime value  $>0.65$  the density plot in **Figure S4B** is shown in  
9 the range [0.65,0.9] to improve visualization and avoid overcrowding. We then analyzed each  
10 region individually in organoids (treated and untreated) and primary tissue to identify potential  
11 subpopulations of cells. Due to the relatively small sample sizes, we applied the clustering method  
12 SC3, whose high accuracy and robustness is derived combining multiple clustering solutions  
13 through a consensus approach (32). SC3 allows the user to pre-define the number of clusters.  
14 Because of the arbitrariness of this choice we varied the number of clusters between 1 and 10,  
15 calculated the stability of clusters across resolutions (SC3 stability index) and built a clustering  
16 tree showing how cells move as the clustering resolution is increased (package clustree), (33). As  
17 shown in **Figure S5C**, no stable sub-trees were formed within each region, indicating absence of  
18 stable clusters defining subpopulations of cells.

19 Regional markers and differentially expressed genes were identified by applying the  
20 Wilcoxon-Rank-Sum test ( $p$ -value $<0.01$ ,  $|\log_2$  fold change $| > 1$ ) in Scanpy. Gene set, gene  
21 ontology and pathway enrichment were performed using the packages GSEA (34) and Enrichr  
22 (35).

23

#### 24 Data availability

25 10X raw data (fastq files) have been deposited in the repository ArrayExpress with the  
26 accession number E-MTAB-8495

27

#### 28 Organoid derivation and culture

29 A portion of the cells isolated for scRNAseq was cultured and propagated as organoids using  
30 our established methodology (11, 12). Cells were cultured under the same conditions irrespective  
31 of their region of origin.

32

#### 33 Immunofluorescence, RNA extraction and Quantitative Real Time PCR

34 IF, RNA extraction and QPCR were performed as previously described (3, 16, 36, 37). A  
35 complete list of the primary and secondary antibodies used is provided in **table S2**. A complete  
36 list of the primers used is provided in **table S3**.

37 All QPCR data are presented as the median, interquartile range (IQR) and range (minimum  
38 to maximum) of four independent lines unless otherwise stated. Values are relative to the  
39 housekeeping gene Hydroxymethylbilane Synthase (HMBS).

40 All IF images were acquired using a Zeiss Axiovert 200M inverted microscope or a Zeiss  
41 LSM 700 confocal microscope. Imagej 1.48k software (Wayne Rasband, NIHR, USA,  
42 <http://imagej.nih.gov/ij>) was used for image processing. IF images are representative of 3 different  
43 experiments.

44

#### 45 GGT activity

1 GGT activity was measured in triplicate using the MaxDiscovery™ gamma-Glutamyl  
2 Transferase (GGT) Enzymatic Assay Kit (Bioo scientific) based on the manufacturer's  
3 instructions. Error bars represent SD.

#### 4 5 Alkaline Phosphatase staining

6 Alkaline phosphatase was carried out using the BCIP/NBT Color Development Substrate (5-  
7 bromo-4-chloro-3-indolyl-phosphate/nitro blue tetrazolium) (Promega) according to the  
8 manufacturer's instructions.

#### 9 10 Flow cytometry analyses

11 Flow cytometry analyses were performed as previously described (11, 12, 28, 29).

#### 12 13 Bile acid treatment

14 Organoids were incubated for 72 hours with 10µM CDA (Sigma, C9377-5G) in the presence  
15 or absence of 10µM Z-GS (Santa Cruz, sc-204414).

#### 16 17 Animal experiments

18 All animal experiments were performed in accordance with UK Home Office regulations (UK  
19 Home Office Project License number PPL 70/8702). Immunodeficient NSG mice (NOD.Cg-  
20 Prkdcscid Il2rgtm1Wjl/SzJ), which lack B, T and NK lymphocytes, were bred in house, and food  
21 and water were available ad libitum before and after procedures. Male animals aged 4–8 weeks  
22 were used. Animals were assigned randomly to treatment and control groups. Experiments were  
23 performed blinded, and where this was not possible (e.g., due to performance of a surgical  
24 procedure), data were analysed blinded to the identity of the experimental groups. Littermate  
25 animals were used as controls.

#### 26 27 Cell delivery

28 Cholangiocytes were delivered into the liver retrogradely through the extrahepatic biliary tree  
29 (14). In brief, a fine bore cannula was placed and secured in the gallbladder. To divert the infusion  
30 into the liver, the distal common bile duct was occluded with a clamp. The cells were infused  
31 through the cannula in the gallbladder in a total volume of 1µl/g of total body weight, at a  
32 maximum speed of 1µl/second.

#### 33 34 MDA administration

35 Cholangiopathy was induced through intraperitoneal (IP) administration of 4,4'-methylene  
36 dianiline (MDA) on 3 occasions 7, 5, and 3 days prior to cell delivery at a concentration of 50 µg/g  
37 of total body weight. An additional dose of MDA was administered directly into the extrahepatic  
38 biliary tree prior to cell delivery as described above.

#### 39 40 Blood sample collection

41 Blood was taken using a 23g needle directly from the inferior vena cava under terminal  
42 anesthesia at the time the animals were electively culled and transferred into 1.5ml Eppendorf  
43 tubes for further processing.

#### 44 45 Blood sample processing

1 The blood samples were routinely processed by the University of Cambridge Core  
2 biochemical assay laboratory (CBAL). All of the sample analysis was performed on a Siemens  
3 Dimension EXL analyzer using reagents and assay protocols supplied by Siemens.  
4

#### 5 Tissue collection

6 Tissue for sectioning and staining was collected at the end of all animal experiments when the  
7 animals were culled, unless otherwise stated. The animals were culled due to animal welfare  
8 reasons (weight loss, jaundice and clinical deterioration) or electively 3 months after  
9 transplantation. Timepoints are indicated on the relevant Kaplan-Meier curves (**Fig. 3B**; **Fig.**  
10 **S13A**).  
11

#### 12 Cryosectioning

13 Excised tissue was fixed in 4% PFA, immersed in sucrose solution overnight, mounted in  
14 optimal cutting temperature (OCT) compound and stored at -80°C until sectioning. Sections were  
15 cut to a thickness of 6-10µm using a cryostat microtome and mounted on microscopy slides for  
16 further analysis.  
17

#### 18 Haematoxylin and Eosin (H&E) Staining

19 H&E staining was performed by the histology service of Addenbrooke's hospital or using  
20 Sigma-Aldrich reagents according to the manufacturer's instructions. Briefly, tissue sections were  
21 hydrated, treated with Meyer's Haematoxylin solution for 5 minutes (Sigma-Aldrich), washed with  
22 warm tap water for 15 minutes, placed in distilled water for 30-60 seconds and treated with eosin  
23 solution (Sigma-Aldrich) for 30-60 seconds. The sections were subsequently dehydrated and  
24 mounted using the Eukitt® quick-hardening mounting medium (Sigma-Aldrich).  
25

#### 26 Histology

27 Histology sections were reviewed by an independent histopathologist with a special interest  
28 in hepatobiliary histology (SD).  
29

#### 30 Quantification of transplanted cells in mouse liver

31 For each animal 3 random sections were analyzed, with different lobes being assessed. A total  
32 of 49,846 cells were analyzed, approximately 10,000 cells per animal.  
33

#### 34 MR imaging

35 Magnetic resonance cholangio-pancreatography was performed after sacrifice of the animals.  
36 MRCP was performed at 9.4T using a Bruker BioSpec 94/20 system (Bruker, Ettlingen, Germany).  
37 For higher signal to noise ratio to give improved visualisation of the biliary ducts a two-  
38 dimensional sequence was used with slightly varied parameters (24 spaced echoes at 11ms  
39 intervals to give an effective echo time of 110ms; repetition time 5741ms; matrix size of 256×256;  
40 field of view of 4.33×5.35cm<sup>2</sup> yielding a planar resolution of 170×200µm<sup>2</sup>). Slices were acquired  
41 coronally through the liver and gall bladder with a thickness of 0.6mm. For this acquisition, a  
42 volume coil was used to reduce the impact of radiofrequency inhomogeneity.

43 To examine the biliary tree, images were prepared by maximum intensity projections.  
44 Structural imaging to rule out neoplastic growths was performed using a T1-weighted 3D FLASH  
45 (fast low-angle shot) sequence with a flip angle of 25°, repetition time of 14ms and an echo time

1 of 7ms. The matrix was 512×256×256 with a field of view of 5.12×2.56×2.56cm<sup>3</sup> for a final  
2 isotropic resolution of 100 μm.

3 Volume rendered images of the biliary tree were generated from source data using Osirix  
4 software. The region of interest was segmented from the remaining data manually.

5 The MRCP images were reviewed by 2 independent radiologists with a special interest in  
6 hepatobiliary radiology (EMG, SU).

#### 7 8 Ex vivo normothermic perfusion of donor livers

9 The *metra* (OrganOx, Oxford, UK) normothermic liver perfusion device was used for ex vivo  
10 perfusion of human livers as previously described (20, 38). The machine, which is clinically used  
11 for preservation of livers for transplantation (20) enables prolonged automated organ preservation  
12 by perfusing it with ABO-blood group-compatible normothermic oxygenated blood. The perfusion  
13 device incorporates online blood gas measurement, as well as software-controlled algorithms to  
14 maintain pH, PO<sub>2</sub> and PCO<sub>2</sub> (within physiological limits), temperature and mean arterial pressure  
15 within physiological normal limits. In brief, the hepatic artery, portal vein, inferior vena cava and  
16 bile duct were cannulated, connected to the device and perfusion commenced.

#### 17 18 Bile duct cannulation

19 Cannulation of the bile duct was achieved by inserting two 4 Fr sheaths into the common bile  
20 duct under fluoroscopy guidance, followed by cannulation of the left and right hepatic ducts and  
21 subsequently segment 3 and segment 5 ducts respectively, using two 2.7 Fr microcatheters via the  
22 sheaths. Peripheral placement of the microcatheters was confirmed by cholangiogram with small  
23 amount of ionic contrast medium. Cells were injected into segment 3 and carrier was injected into  
24 segment 5.

#### 25 26 Cell delivery

27 RFP-expressing organoids were mechanically dissociated to a mixture of small clumps and  
28 single cells and approximately 10x10<sup>6</sup> RFP-expressing cells were administered in a peripheral  
29 duct of segment 3 with a distribution area of ~2cm<sup>3</sup>, which was cannulated under fluoroscopic  
30 guidance to maximize cell delivery (see Bile duct cannulation section) (**Fig. S15B**). Carrier  
31 medium was delivered in a peripheral branch of segment 5 using the same technique and the organ  
32 was maintained on NMP for up to 100 hours.

#### 33 34 Quantification of transplanted cells in human livers

35 3 human livers injected with RFP-labelled gallbladder organoids were analysed. Sections  
36 were obtained from the area of the distribution of the cells (~2cm<sup>3</sup>). 5 sections per liver and a total  
37 of 4,463 cells were analysed.

#### 38 39 Bile aspiration

40 Bile duct cannulation was performed as described in the relevant section. Following  
41 cannulation, 2 microfluidic catheters (CMA Microdialysis Catheter, Harvard Bioscience Inc, USA)  
42 were placed into the respective segmental ducts using a guide wire exchange technique. The inner  
43 and outer shaft of the catheter and the inlet and outlet tubing are made of polyurethane and the  
44 membrane composed of polyarylethersulphone with a membrane pore size of 100kDa and outer  
45 diameter of 0.4mm. The inlet tubing for each catheter was connected to a portable battery driven



1 CMA 107 Microdialysis Pump (Harvard Bioscience Inc, USA) and the pump was set to aspirate at  
2 a rate of 1µl/min.

### 3 4 Bile volume and pH measurements

5 Measurements were performed in n=3 different livers. A minimum of 2 repeat measurements  
6 were performed for each liver increasing to 3 where possible, as previously described (38). Bile  
7 volume was normalised over the volume of the bile ducts producing it, which corresponds to the  
8 volume of distribution of the cells or the carrier in the control arm. This was calculated using the  
9 volume of the contrast medium required to delineate these ducts on cholangiogram. Please note all  
10 catheters were primed prior to volume measurements.

### 11 12 Ultrasound imaging

13 The liver was imaged ex-vivo in a normothermic perfusion device using a Hitachi Aloka  
14 Arrieta V70 and a 10Mhz hand-held probe. Images were obtained in axial and sagittal planes and  
15 assessment of the portal vein, hepatic veins and their major branches was carried out. The  
16 intrahepatic bile ducts were also assessed, with particular attention to segment 3 where the  
17 organoids had been instilled, and a control area in segment 5 receiving carrier.

### 18 19 Statistical analysis

20 All statistical analyses were performed using GraphPad Prism 6. For small sample sizes  
21 where descriptive statistics are not appropriate, individual data points were plotted. For  
22 comparison between 2 mean values a 2-sided Student's t-test was used to calculate statistical  
23 significance. The normal distribution of our values was confirmed using the D'Agostino & Pearson  
24 omnibus normality test where appropriate. Variance between samples was tested using the Brown-  
25 Forsythe test. For comparing multiple groups to a reference group one-way ANOVA followed by  
26 Dunnett's test was used between groups with equal variance, while the Kruskal-Wallis test  
27 followed by Dunn's test was applied for groups with unequal variance. Survival was compared  
28 using log-rank (Mantel-Cox) tests. Where the number of replicates (n) is given this refers to  
29 organoid lines or number of different animals unless otherwise stated.

30 For animal experiments, group sizes were estimated based on previous study variance. Final  
31 animal group sizes were chosen to allow elective culling at different time point while maintaining  
32 n > 4 animals surviving past 30 days to ensure reproducibility. No statistical methods were used  
33 to calculate sample size. No formal randomization method was used to assign animals to study  
34 groups. However, littermate animals from a cage were randomly assigned to experimental or  
35 control groups by a technician not involved in the study. No animals were excluded from the  
36 analysis. Blinding was used for radiology imaging.

Supplementary Figure 1

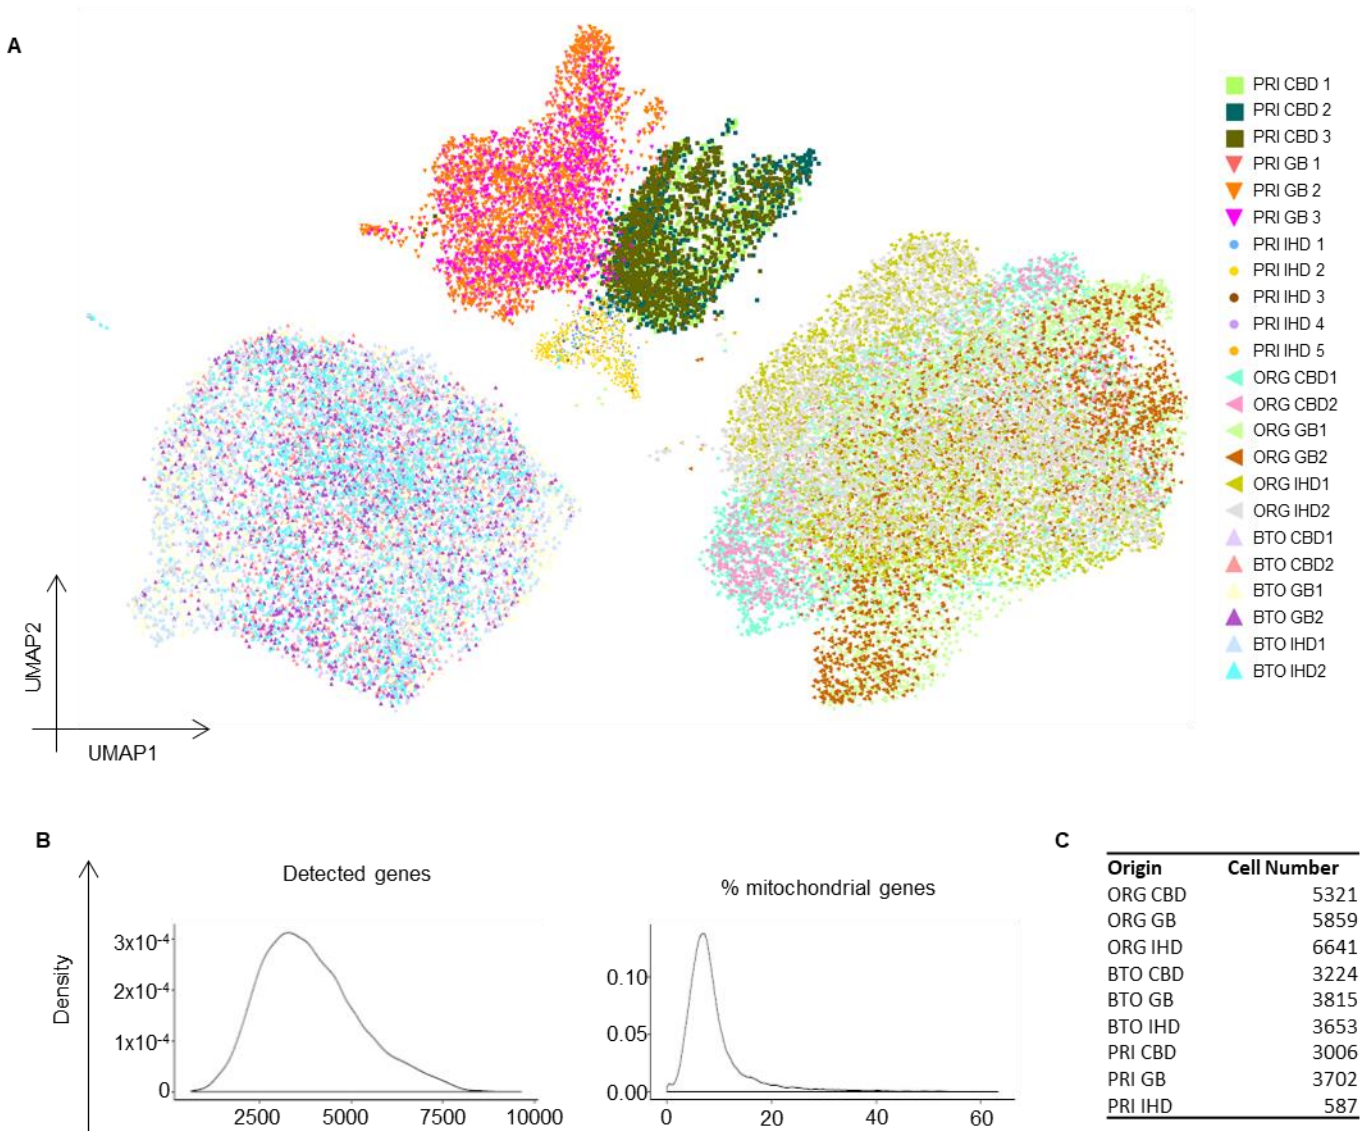

1  
2  
3

4 **Fig. S1.**

5 **Characteristics and quality control of single cell RNA sequencing samples. (A)** UMAP plot of  
6 all sequenced samples and 1 publicly available intrahepatic cholangiocyte dataset (PRI IHD 5;  
7 from MacParland SA et al, 2018, cluster 17). Each patient and cell line are distinguished by a  
8 unique color and marker combination. **(B)** Number of genes and percentage of mitochondrial genes  
9 detected per cell. **(C)** Number of cells isolated from each region PRI, Primary; IHD, IntraHepatic  
10 Ducts; CBD, Common Bile Duct; GB, Gallbladder; ORG, Organoids; BTO, Bile-treated  
11 organoids.

12  
13

Supplementary Figure 2

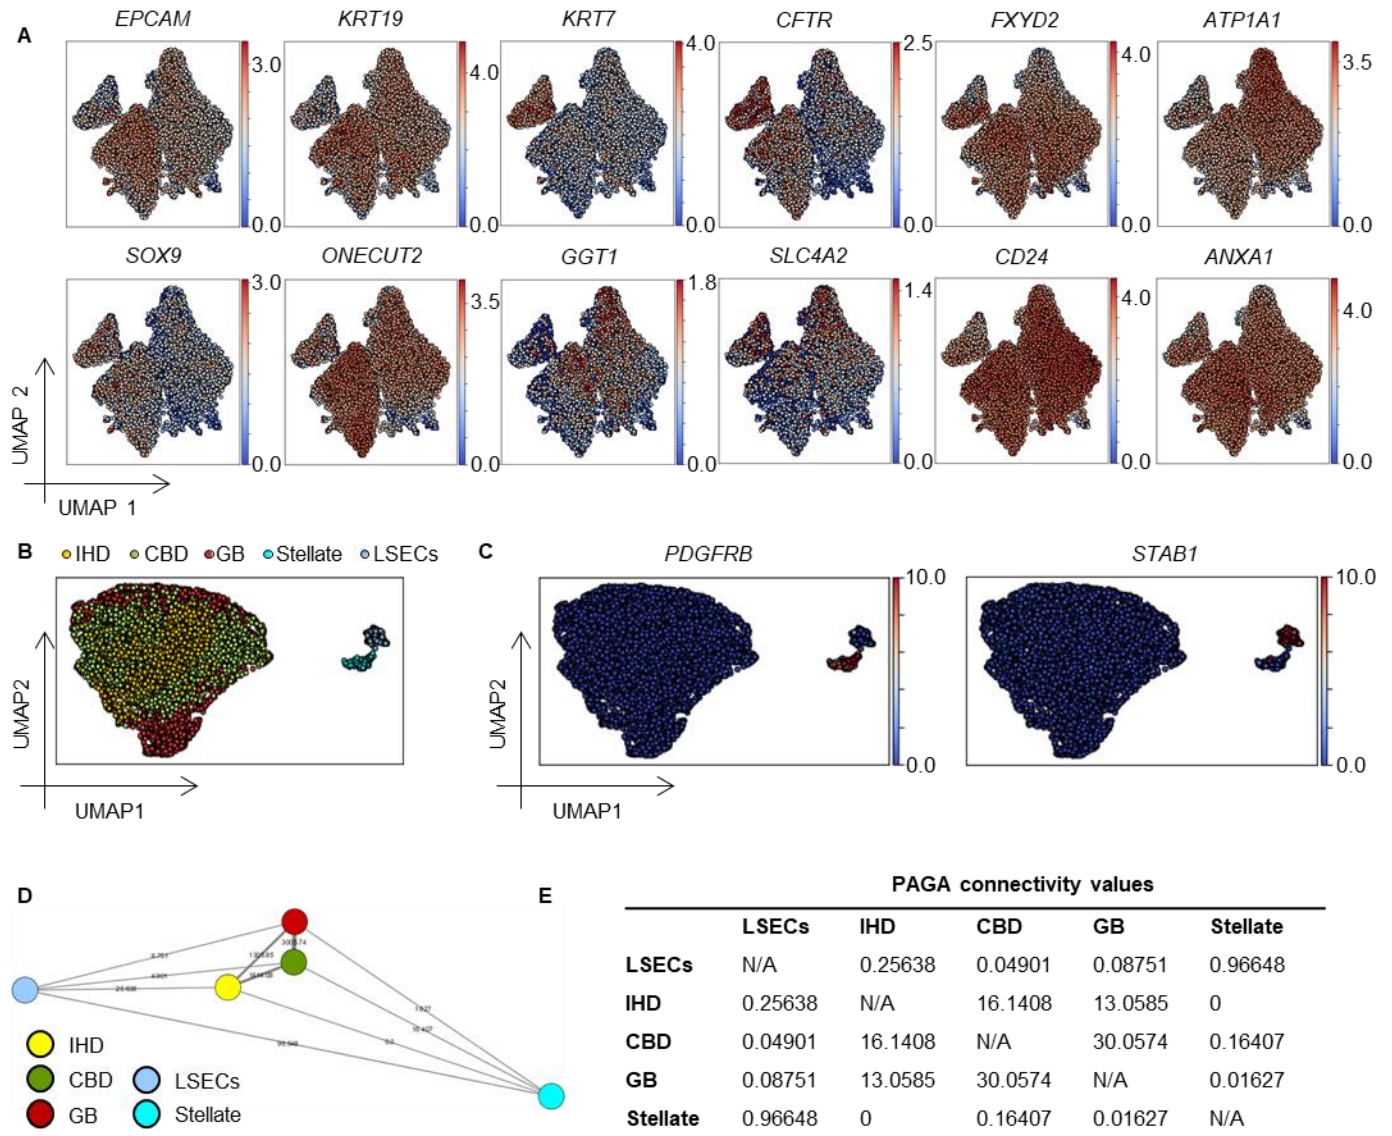

1

2 **Fig. S2.**

3 **Single cell RNA sequencing characterization of primary cholangiocytes.** (A) UMAP plots  
 4 demonstrating the expression of key cholangiocyte markers by the isolated cells, confirming their  
 5 biliary identity. (B) UMAP plot of primary cholangiocytes compared to stellate and liver  
 6 sinusoidal endothelial cells (LSECs) illustrating overlap between different region cholangiocytes  
 7 when compared to a different cell type, which reflects a shared core biliary signature. (C) UMAP  
 8 plots illustrating the expression of LSEC and stellate cell markers, confirming the cells' identity.  
 9 (D-E) PAGA connectivity plot (D) and corresponding connectivity values (E) demonstrating a  
 10 higher degree of transcriptional similarity between cholangiocytes from different regions  
 11 compared to different cell types, confirming the shared core transcriptional signature of the cells.  
 12 IHD, IntraHepatic Ducts; CBD, Common Bile Duct; GB, Gallbladder.

13

14

Supplementary Figure 3

A

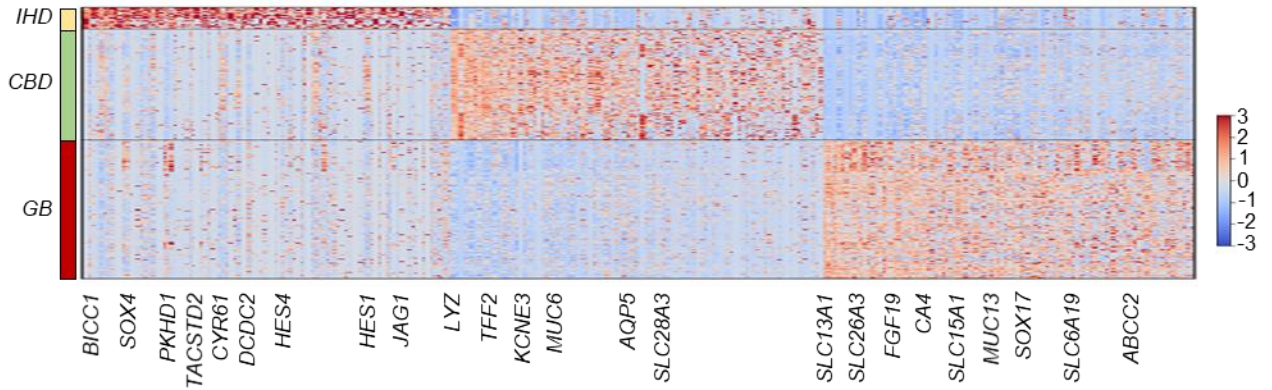

B

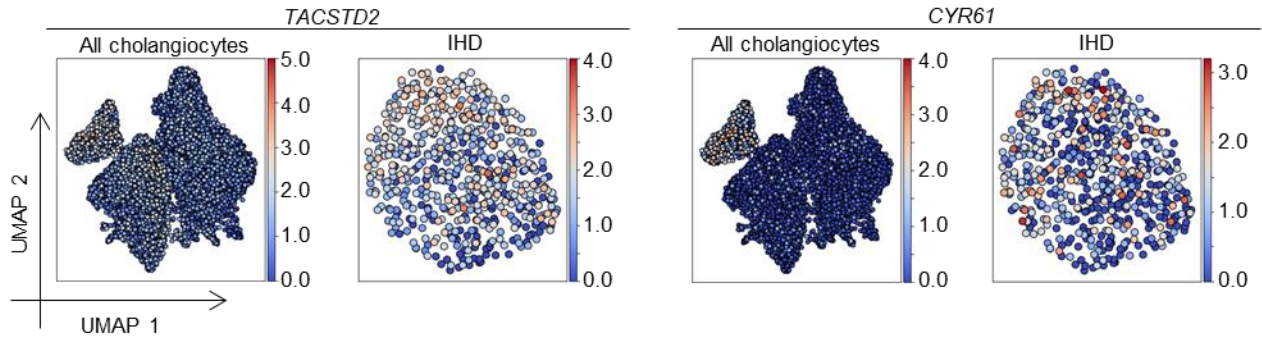

C

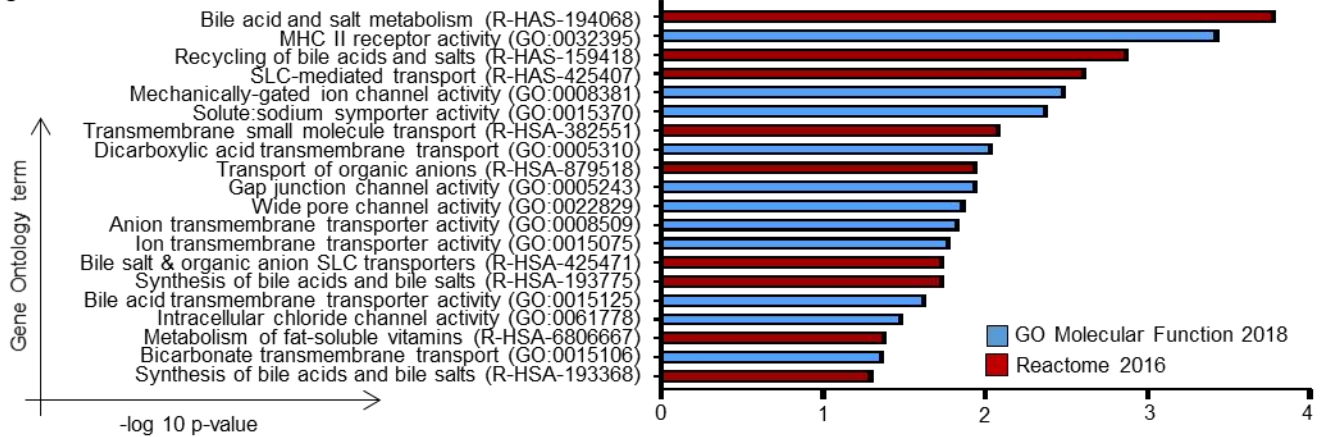

D

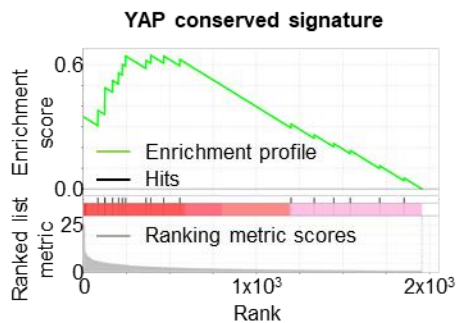

E

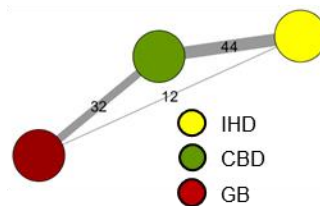

F

PAGA connectivity values

|     | IHD      | CBD      | GB       |
|-----|----------|----------|----------|
| IHD | N/A      | 0.448617 | 0.123883 |
| CBD | 0.448617 | N/A      | 0.321571 |
| GB  | 0.123883 | 0.321571 | N/A      |

1 **Fig. S3.**  
2 **Characterization of the transcriptional signature of cholangiocytes from different regions of**  
3 **the biliary tree.** (A) Heatmap of top 100 Differentially Expressed Genes (DEGs) in  
4 cholangiocytes isolated from distinct regions of the biliary tree revealing transcriptional diversity  
5 in the primary biliary epithelium. IHD, IntraHepatic Ducts; CBD, Common Bile Duct; GB,  
6 Gallbladder (**Data S1**). (B) UMAP plots confirming the expression of previously described  
7 markers in IHDs. (C) Gene Ontology (GO) analysis on DEGs between biliary tree regions using  
8 EnrichR illustrating enrichment of cholangiocyte-to-niche interaction markers, such as bile  
9 processing and modifying genes. (D) Gene Set Enrichment Analyses on DEGs between biliary  
10 tree regions identifying differences in the expression of YAP target genes,  $P < 0.001$ . (E-F) PAGA  
11 connectivity plot (E) and corresponding connectivity values (F) demonstrating a higher degree of  
12 transcriptional similarity between adjacent regions of the biliary tree. Connectivity values  
13 illustrated in (E) are multiplied by 100.  
14

Supplementary Figure 4

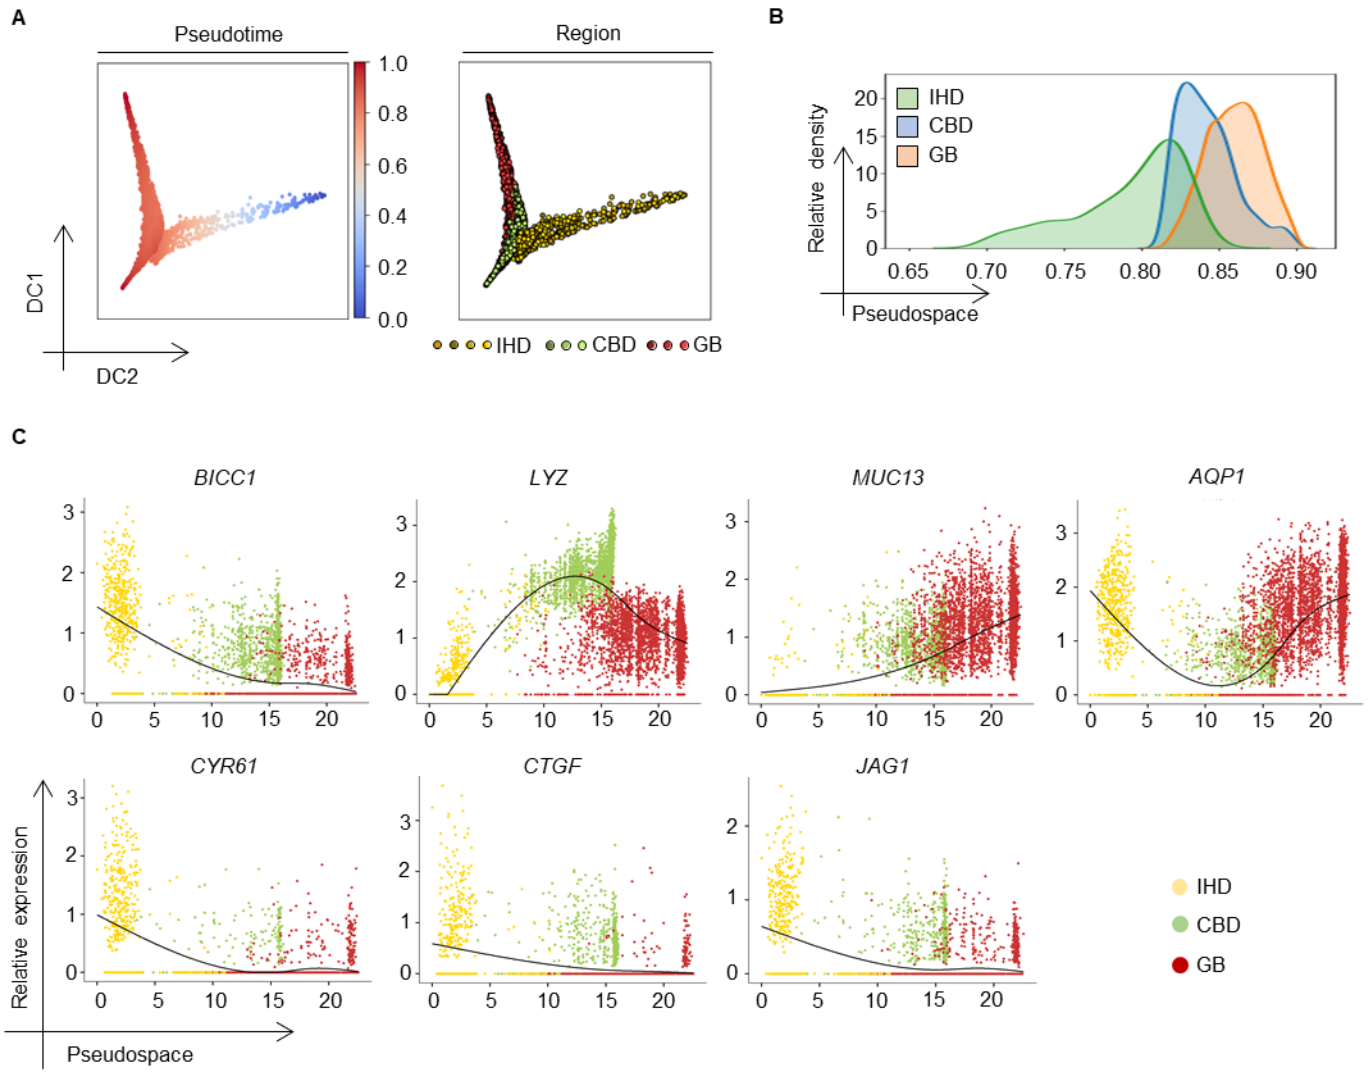

1

1 **Fig. S4.**

2 **Pseudotime analysis of primary cholangiocytes.** (A) Cell trajectory in pseudotime using  
3 Monocle; (B) Density plot of pseudo-time coordinates and (C) Gene expression in pseudotime of  
4 representative region markers indicating a gradual transition in transcriptional profile between  
5 cholangiocyte populations from adjacent regions. IHD: Intrahepatic Ducts, CBD: Common Bile  
6 Duct, GB: Gallbladder

7

Supplementary Figure 5

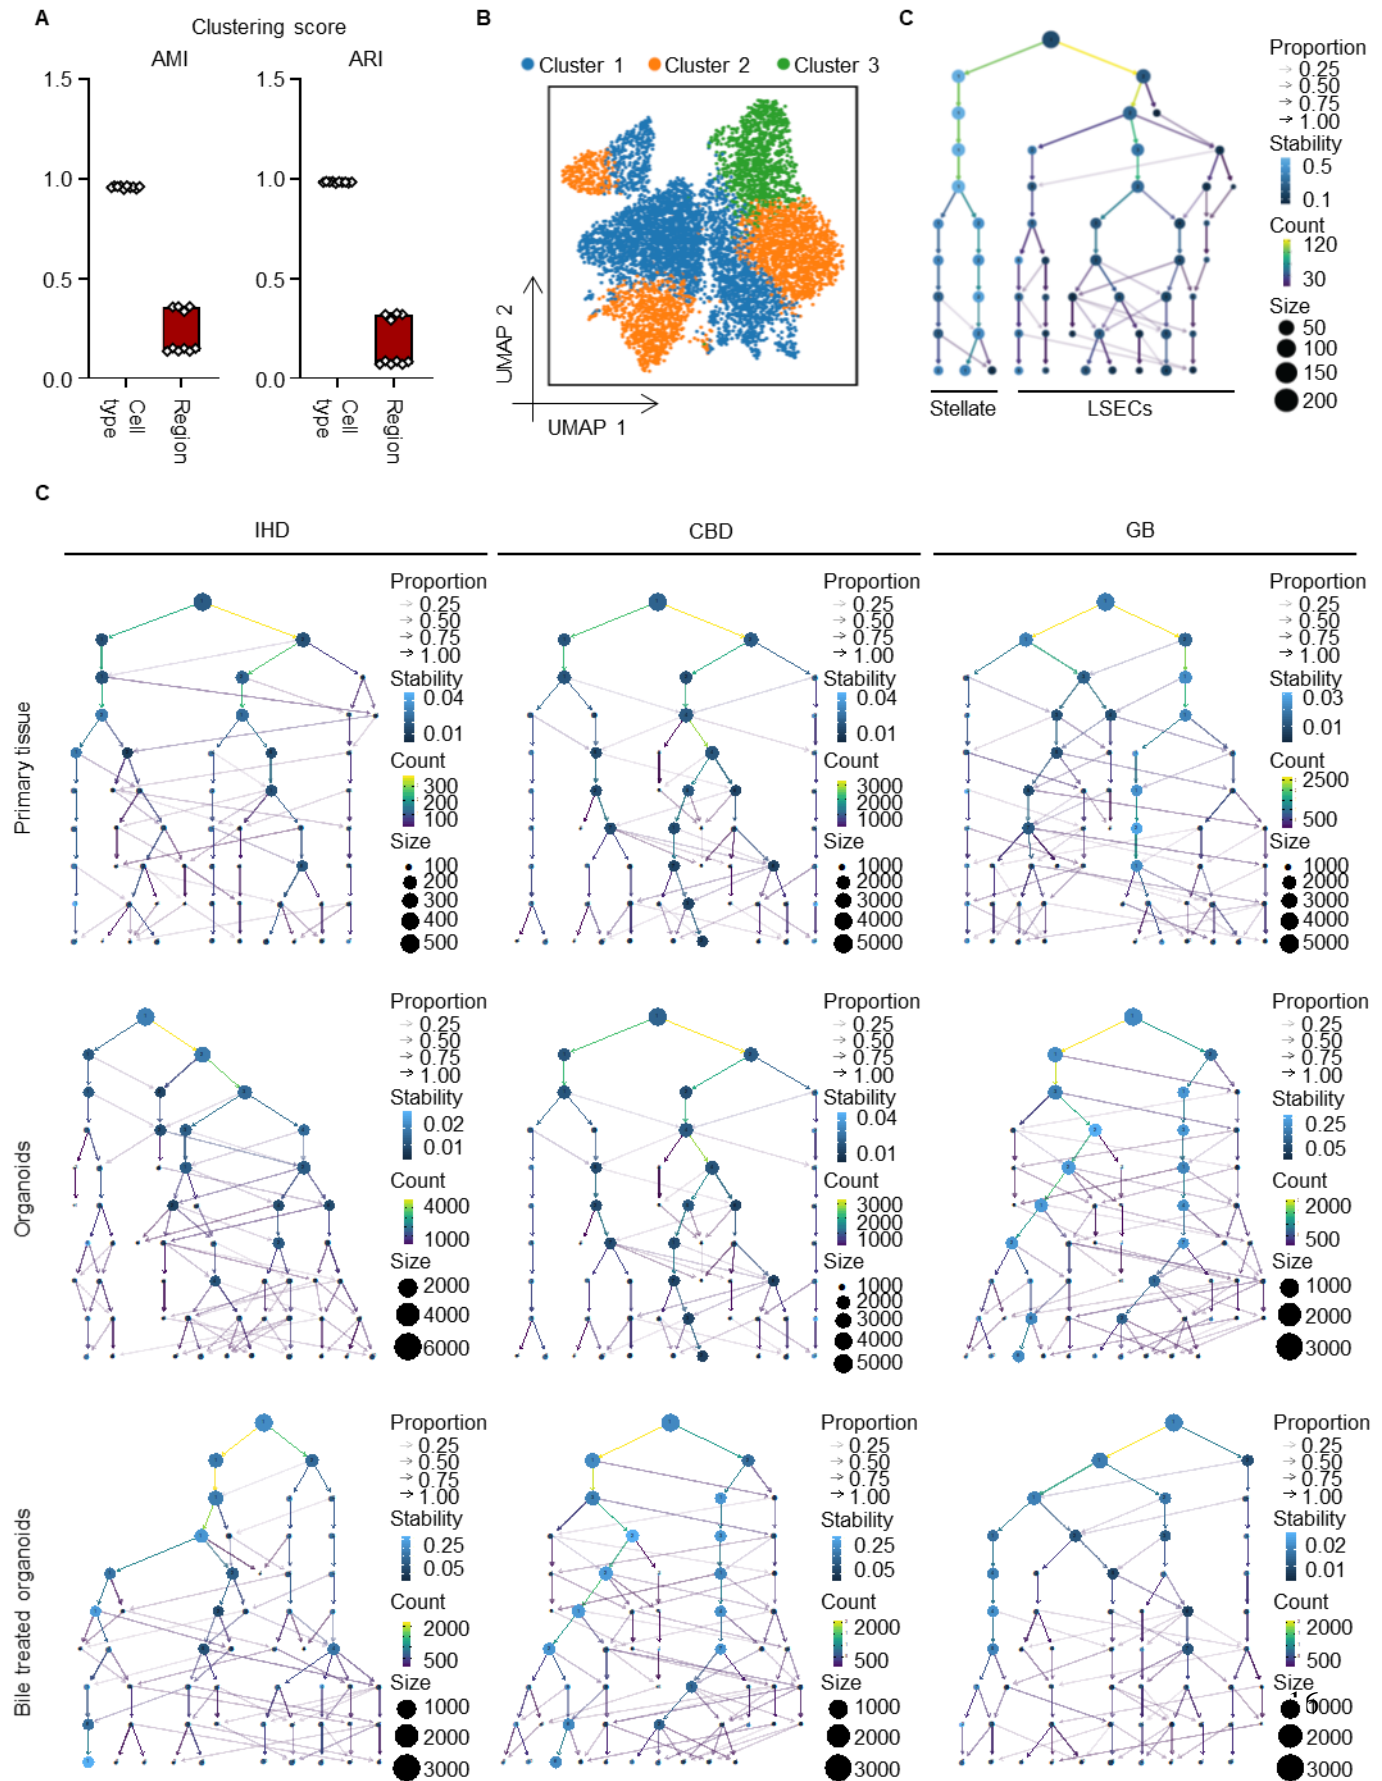



1 **Fig. S5.**  
2 **Characterization of cluster stability.** (A) Adjusted Rand Index (ARI) and the Adjusted Mutual  
3 Information (AMI) confirming that primary cholangiocytes, organoids, and bile-treated organoids  
4 constitute distinct populations by illustrating a high correspondence between Louvain clusters and  
5 cell type (primary, organoids, bile-treated organoids) annotations (average value > 0.95 for both  
6 measures) vs. poor correspondence between Louvain clusters and region (intrahepatic ducts,  
7 common bile duct, gallbladder) annotations (average value < 0.3 for both measures). (B) UMAP  
8 plot of Louvain clusters demonstrating poor matching between regions and clusters. The plot  
9 corresponds to the UMAP plot in **Fig. 1B** illustrating different regions. (C-D) Clustering trees  
10 derived from SC3 clusters by varying the pre-defined number of clusters k from 1 to 10 (see  
11 Methods) for a positive control comprising of stellate cells and LSECs (C) vs. cholangiocytes from  
12 different regions and corresponding cholangiocyte organoids (D). Cluster stability across different  
13 clustering resolutions confirms the presence of different populations (stellate vs. LSECs) in the  
14 positive control (C); while the absence of well-defined cholangiocyte subpopulations in each  
15 anatomical region or between organoids from different regions is demonstrated by the lack of  
16 stable clusters in (D).  
17

Supplementary Figure 6

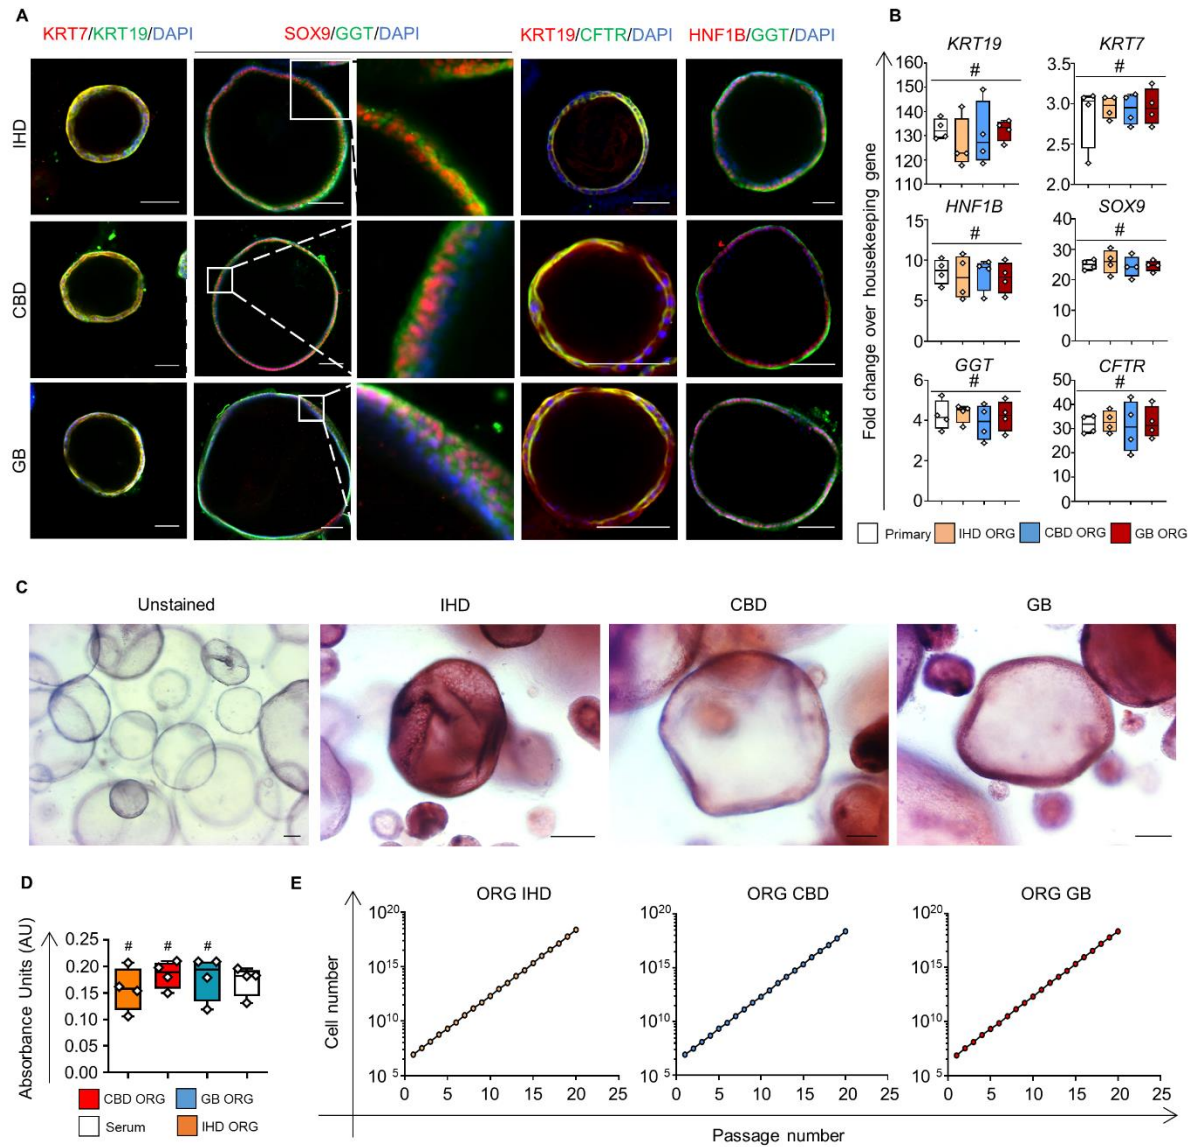

1  
2

3 **Fig. S6.**

4 **Characterization of cholangiocyte organoids from different regions of the biliary tree. (A)**  
 5 **Immunofluorescence and (B) QPCR analysis of cholangiocyte organoids derived from different**  
 6 **regions of the biliary tree demonstrating uniform expression of key biliary markers. n=4 samples**  
 7 **per group; center line, median; box, interquartile range (IQR); whiskers, range; housekeeping**  
 8 **gene, HMBS; #P>0.05#; scale bars, 50µm. (C-D) Organoids from different regions demonstrate**  
 9 **Alkaline Phosphatase (ALP) (C) and GGT (Gamma-glutamyltransferase) (D) function. Scale bars,**  
 10 **100µm. (E) Growth curves illustrating comparable expansion potential between organoids from**  
 11 **different regions. #, P>0.05. IHD, IntraHepatic Ducts; CBD, Common Bile Duct; GB, Gallbladder;**  
 12 **ORG, Organoids; Primary, Primary CBD cholangiocytes.**

13  
14

Supplementary Figure 7

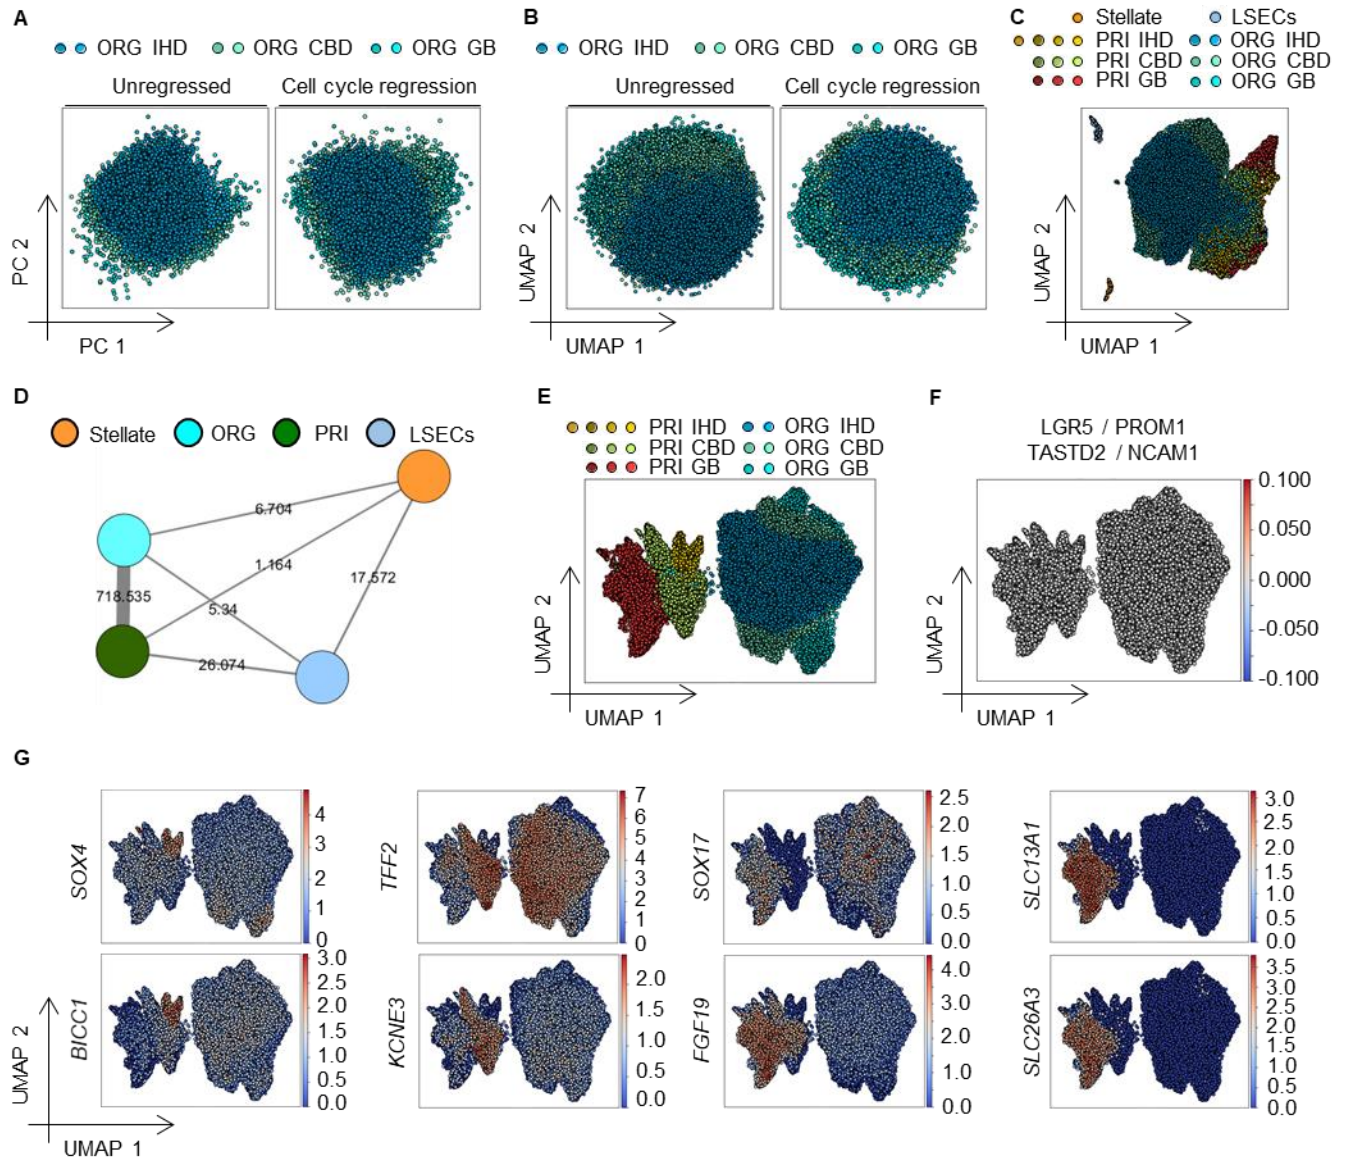

1

2 **Fig. S7.**

3 **Single-cell RNA sequencing characterization of cholangiocyte organoids from different**  
 4 **regions of the biliary tree.** (A) PCA (unregressed, 24.8%; cell cycle regression, 21.8% of  
 5 variance) and (B) UMAP representation demonstrating overlap in the transcriptional profile of  
 6 different region organoids before and after cell cycle regression, confirming that cell cycle genes  
 7 are not responsible for these similarities. (C) UMAP plot demonstrating that organoids and  
 8 primary cholangiocytes irrespective of region occupy adjacent and overlapping spaces when  
 9 compared to different cell types, illustrating a shared cholangiocyte transcriptional signature  
 10 between biliary cells in vivo and in vitro. (D) PAGA connectivity plot demonstrating a higher  
 11 degree of transcriptional similarity between cholangiocytes in vivo (PRI, Primary) and in vitro  
 12 (ORG, organoids) compared to different cell types, confirming the shared core transcriptional

1 signature of the cells. Respective connectivity values multiplied by 100 are illustrated on the plot.  
2 IHD, IntraHepatic Ducts; CBD, Common Bile Duct; GB, Gallbladder; LSECs, Liver Sinusoidal  
3 Endothelial Cells. **(E)** UMAP representation following regression of cell cycle genes illustrating  
4 that the similarities between cholangiocyte organoids are preserved despite cell-cycle regression  
5 and therefore they are not attributable to a common ‘proliferation’ signature. **(F)** UMAP  
6 representation of cells co-expressing somatic stem cell markers (normalized expression>1),  
7 illustrating that similarities between organoids are not attributable to a common ‘stem cell’  
8 signature. **(G)** UMAP representation of normalized gene expression values showing that organoids  
9 lose differences in the expression of region marks in culture.  
10

Supplementary Figure 8

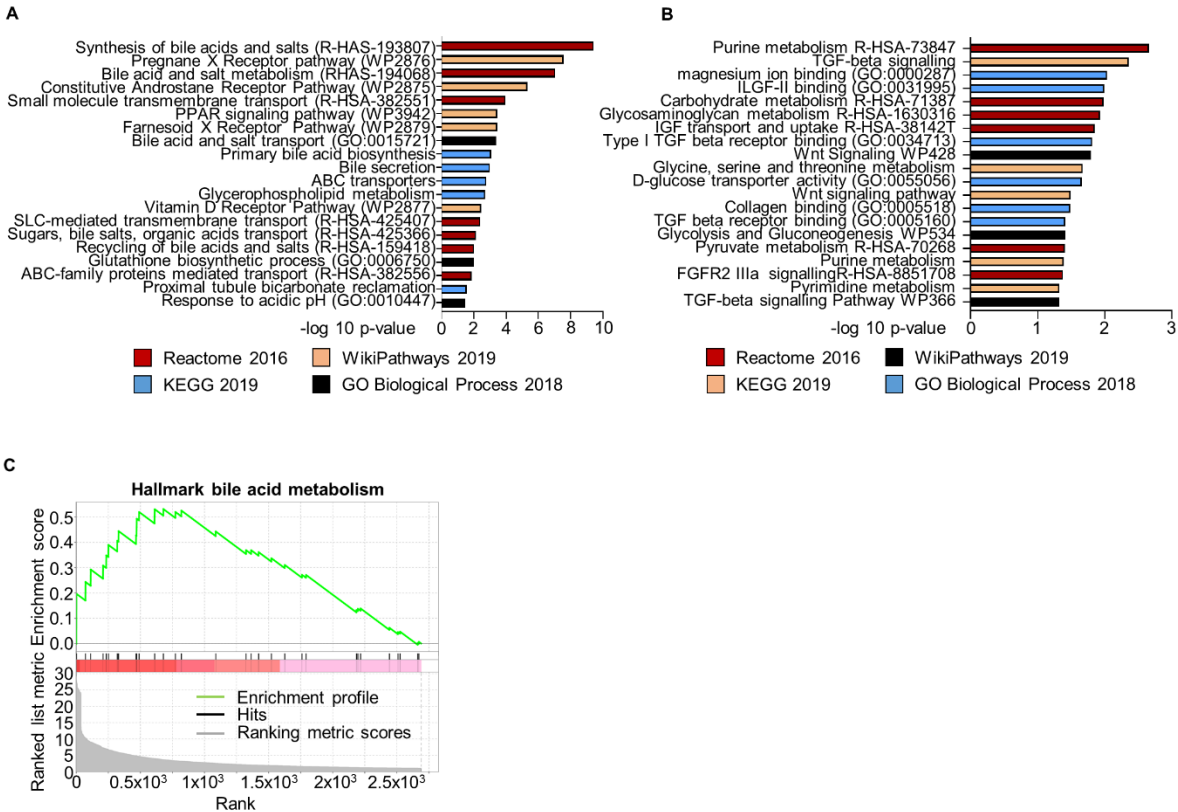

1  
 2  
 3  
 4  
 5  
 6  
 7  
 8  
 9  
 10  
 11  
 12  
 13  
 14  
 15

**Fig. S8.**

**Gene ontology (GO) analyses on cholangiocyte organoids.** (A-B) GO analysis on differentially expressed genes between primary cholangiocytes and organoids using EnrichR demonstrating that genes upregulated in primary tissue (A) are related to cholangiocyte-to-niche interaction, such as bile processing genes; while genes upregulated in organoids (B) reflect adaptation to cell culture conditions such as insulin, pyruvate and cytokine processing genes. (C) Gene Set Enrichment Analyses on DEGs between primary cells and organoids identifying differences in the expression of bile acid processing genes,  $P= 0.035$ . IHD, IntraHepatic Ducts; CBD, Common Bile Duct; GB, Gallbladder; ORG, Organoids.

1 Supplementary Figure 9

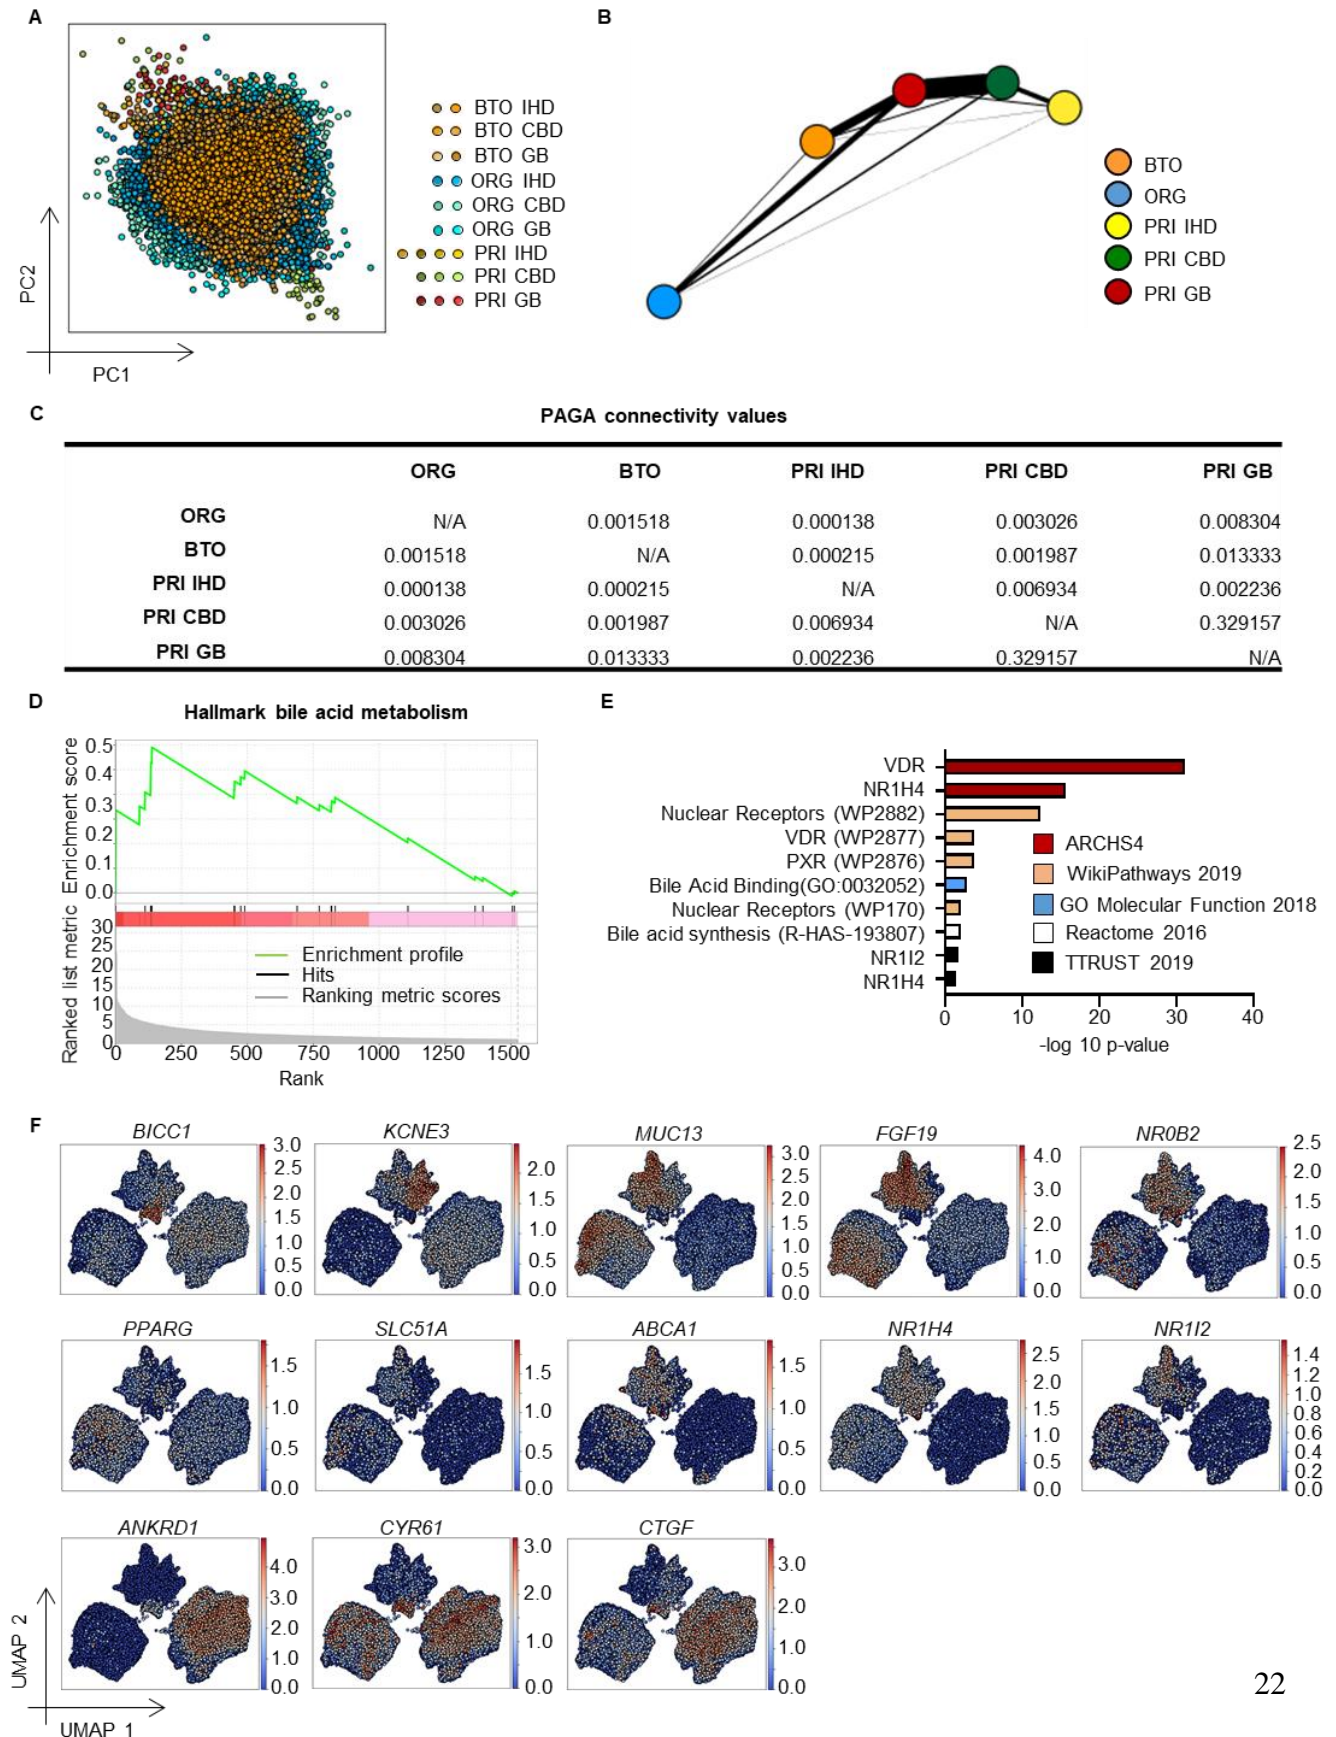

1

2 **Fig. S9.**

3 **Characterization of bile-treated organoids.** (A) PCA analysis (16.8% of variance) showing  
4 overlap between organoids, primary cholangiocytes and bile-treated organoids irrespective of  
5 region suggesting a shared core transcriptional profile between all cells. (B) PAGA connectivity  
6 plot demonstrating that bile-treated organoids (BTO) shift their transcriptional profile towards  
7 primary gallbladder cholangiocytes. (C) Connectivity values corresponding to the PAGA  
8 connectivity plot in panel (B) IHD, IntraHepatic Ducts; CBD, Common Bile Duct; GB,  
9 Gallbladder; ORG, Organoids; BTO, Bile-treated organoids; PRI, Primary. (D-E) GSEA (D) and  
10 GO analysis using EnrichR (E) on differentially expressed genes in organoids before and after  
11 treatment with bile showing enrichment in bile processing genes and in particular bile acid nuclear  
12 receptors and their downstream targets.  $P=0.012$ . (F) UMAP representation of normalized gene  
13 expression values illustrating upregulation of gallbladder markers and bile acid downstream targets  
14 following treatment of organoids with gallbladder bile.

15

16

Supplementary Figure 10

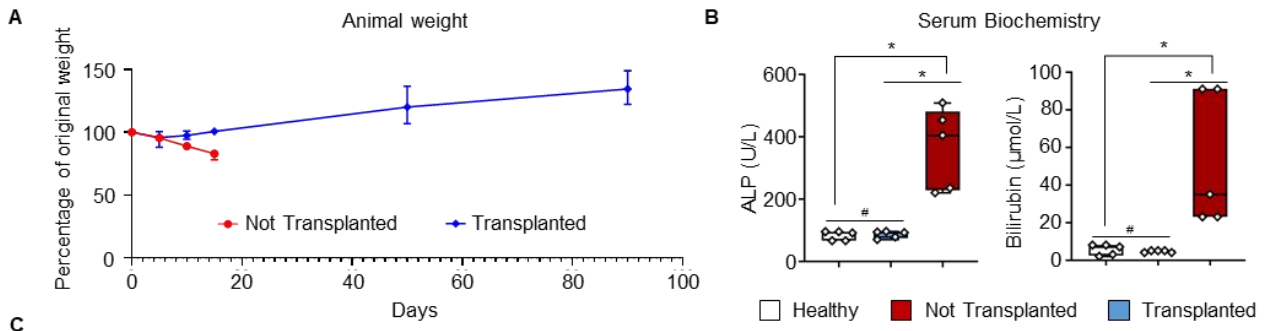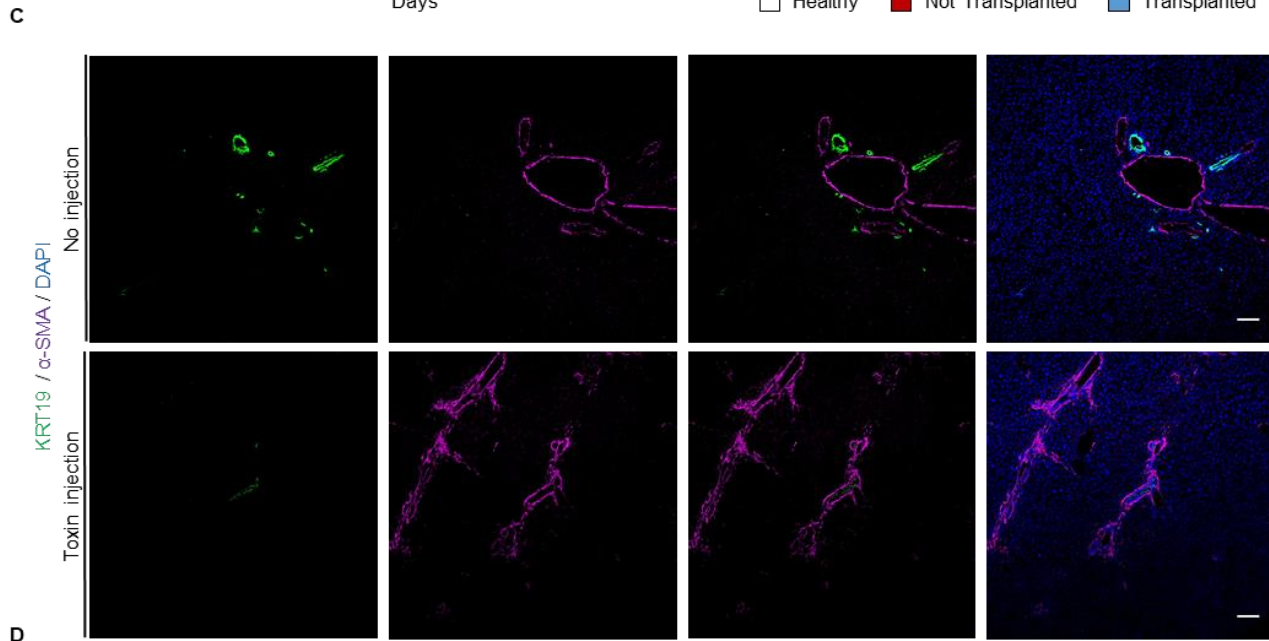



1 **Fig. S10.**  
2 **Gallbladder organoids rescue an acute cholangiopathy mouse model following**  
3 **transplantation. (A)** Weight curve of animals treated with MDA (not transplanted) vs. animals  
4 injected with organoids following toxin treatment, demonstrating that injected animals recover and  
5 gain weight; n=5 animals in each arm. **(B)** Serum biochemistry demonstrating resolution of  
6 cholestasis following organoid injection; \* $P < 0.05$ , # $P > 0.05$ , Kruskal-Wallis test. **(C)**  
7 Immunofluorescence images of MDA treated animals not transplanted with cells (toxin injection)  
8 vs. untreated controls (no injection) illustrating biliary injury following MDA administration. The  
9 images are complementary to **Fig. 3D**. **(D)** Histology (Heamatoxylin & Eosin and Elastic Picro  
10 Sirius Red) illustrating resolution of cholangiopathy following organoid injection. Asterisks: Bile  
11 ducts.  
12

Supplementary Figure 11

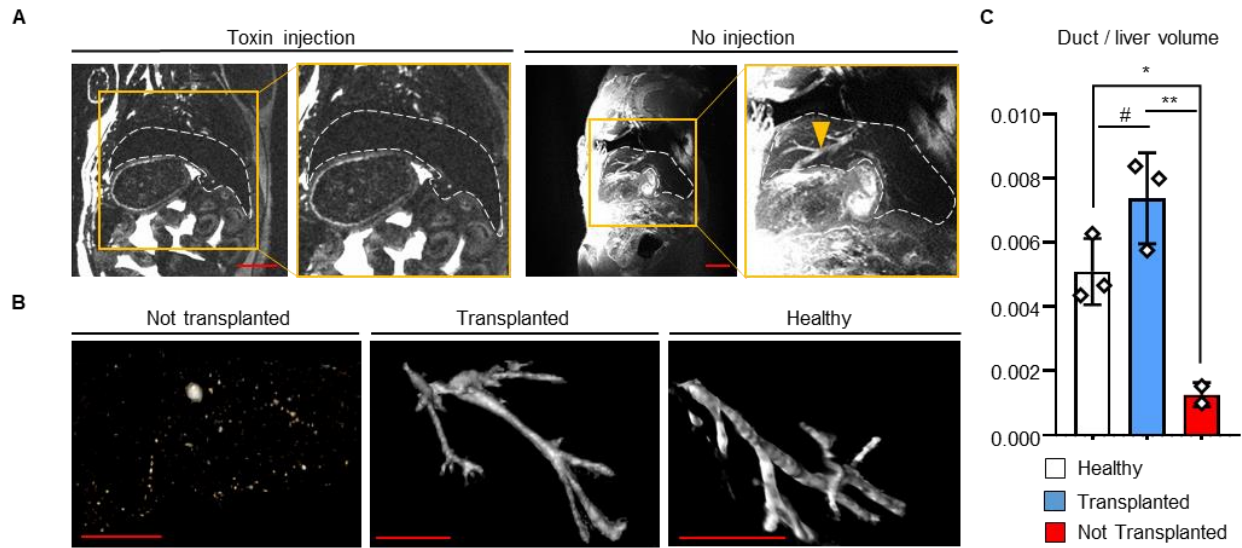

1  
2 **Fig. S11.**  
3 **Gallbladder organoids regenerate the biliary tree of an acute cholangiopathy mouse model**  
4 **following transplantation.** (A) Magnetic Resonance Cholangiopancreatography (MRCP)  
5 demonstrating biliary injury with loss of bile duct signal (white), immediately after toxin injection.  
6 The white dashed line outlines the liver margins. The image is complementary to **Fig. 3C**. Scale  
7 bars, 5mm. (B) 3D reconstruction of MRCP images demonstrating biliary injury with loss of bile  
8 duct signal in MDA-treated animals receiving carrier (not transplanted); vs. duct reconstruction in  
9 MDA-treated animals receiving organoid injections; vs. healthy animals. Scale bars, 5mm. (C)  
10 Quantification of bile duct signal on MRCP normalized over total liver volume in not transplanted  
11 vs. transplanted vs. healthy animals, demonstrating resolution of cholangiopathy following  
12 organoid injection; #,  $P > 0.05$ ; \*,  $P < 0.05$ ; \*\*,  $P < 0.01$ ; one-way ANOVA.

Supplementary Figure 12

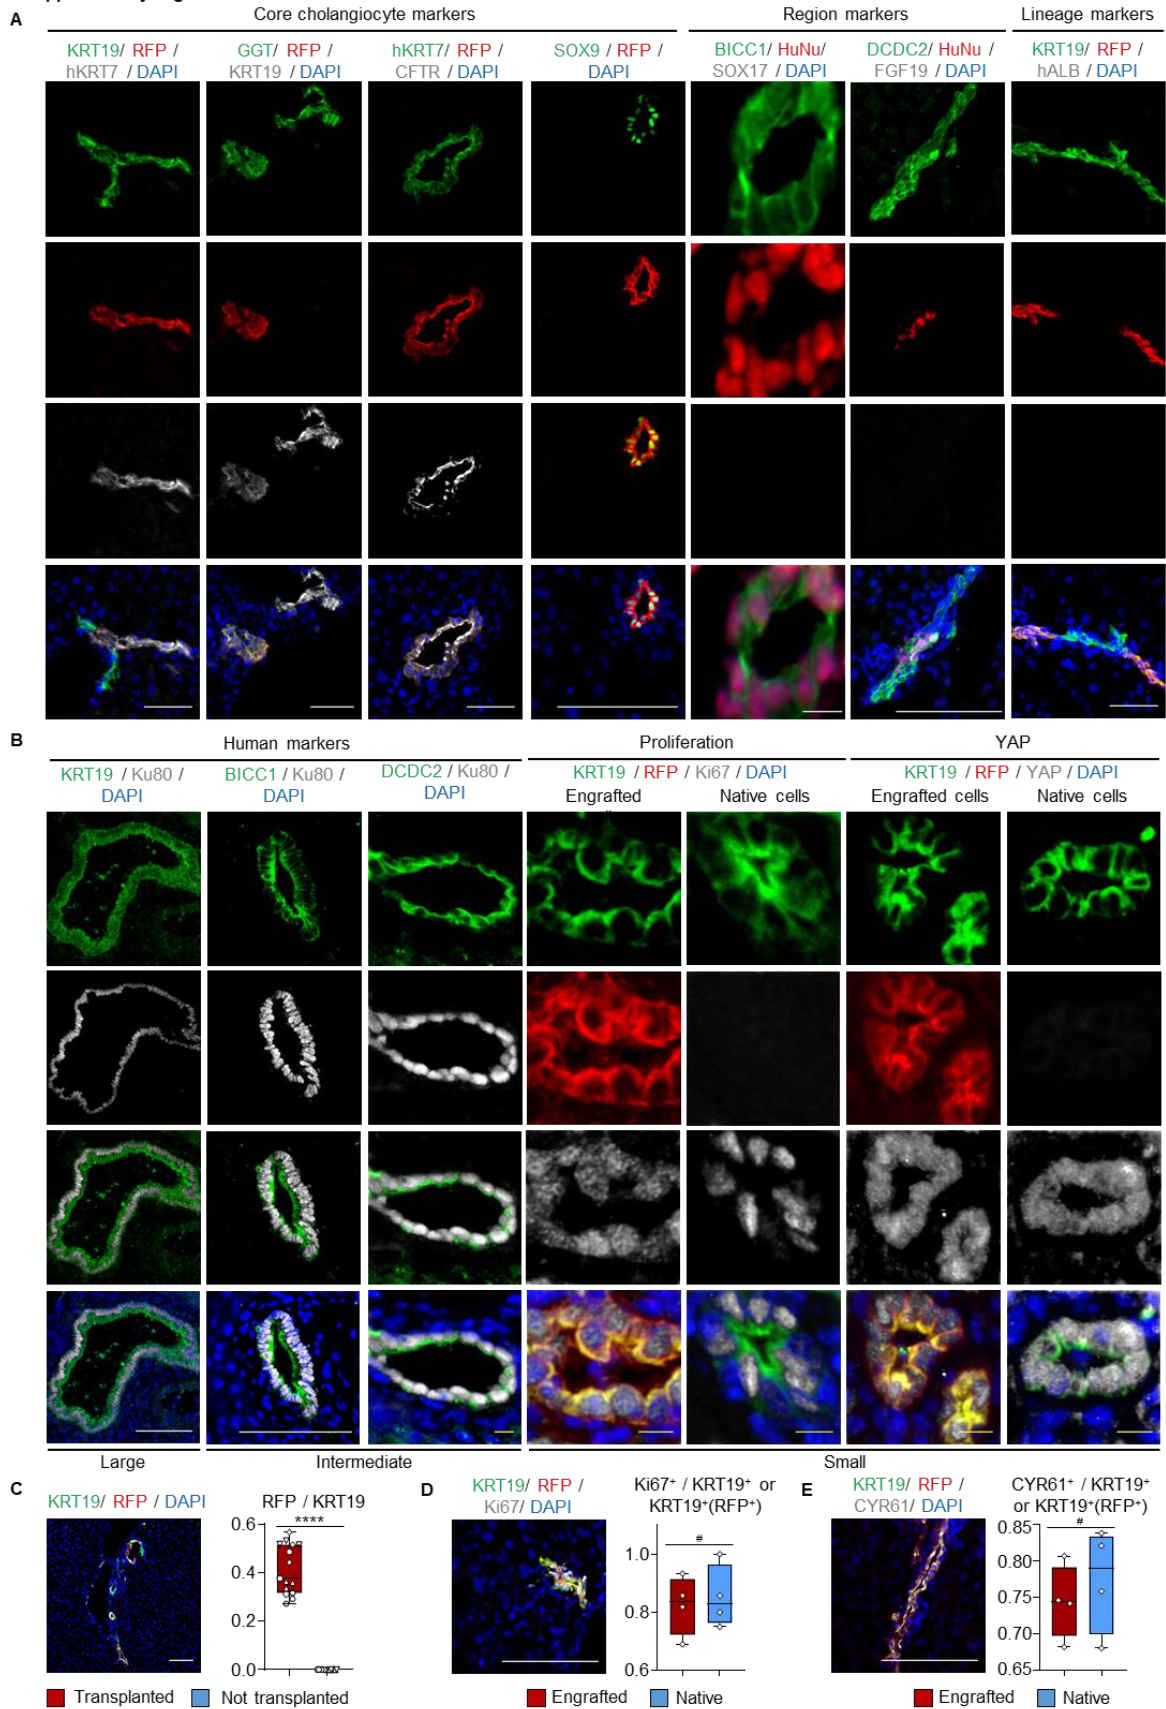

1 **Fig. S12.**  
2 **Gallbladder organoids regenerate the biliary epithelium of an acute cholangiopathy mouse**  
3 **model following transplantation.** (A-B) Immunofluorescence analysis demonstrating  
4 engraftment, expression of key biliary markers, loss of gallbladder markers, expression of  
5 intrahepatic markers, absence of markers of other hepatic lineages (A); and expression of human  
6 specific markers, proliferation markers and active YAP (B) in human Red Fluorescent Protein  
7 (RFP) expressing cells following transplantation in immunocompromised mice with  
8 cholangiopathy. Scale bars; (A), 50µm; (B), 50µm (yellow), 100µm (white). The images are  
9 complementary to **Fig. 3.** (C) Quantification of human gallbladder-derived RFP-expressing cells  
10 in the bile ducts of transplanted vs. not transplanted animals; \*\*  $P < 0.01$ ; Mann-Whitney test. The  
11 data corresponds to 5 different animals and 3 random sections per animal. Each section is  
12 represented by a data point, while each animal is represented by a different symbol. (D-E)  
13 Quantification of the ratio of cells expressing proliferation markers (Ki67, D) and YAP  
14 downstream targets (CYR61, E) in ducts regenerated from engrafted human RFP-expressing cells  
15 vs. native mouse bile ducts in the same animals; #  $P > 0.05$ ; Mann-Whitney test.  
16

Supplementary Figure 13

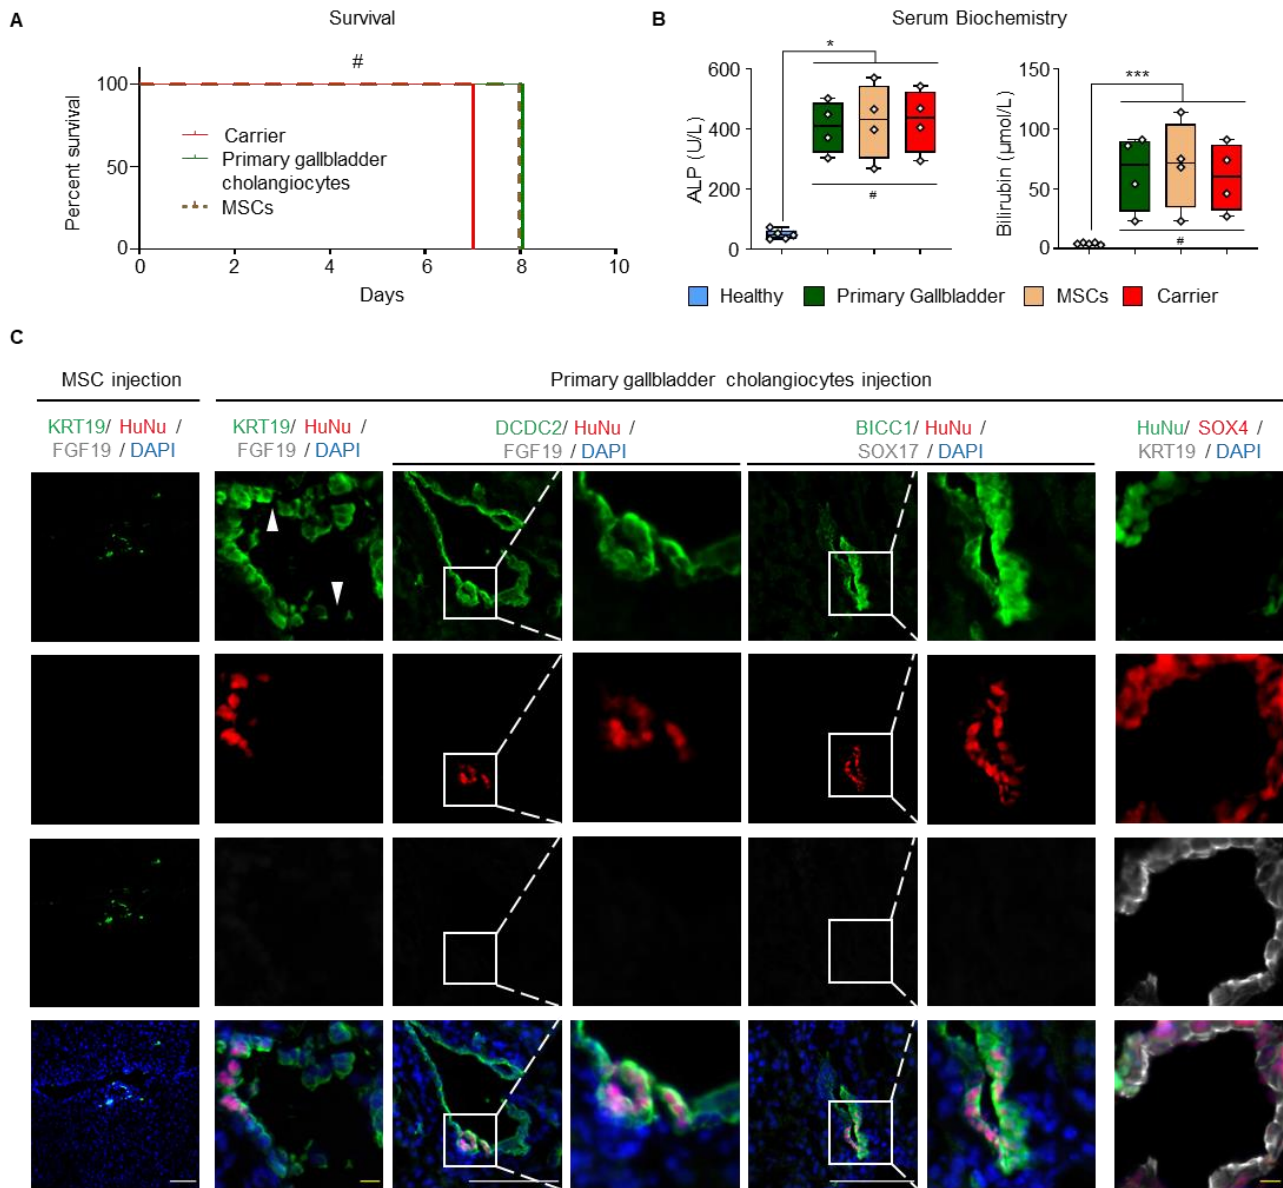

1  
 2 **Fig. S13.**  
 3 **Primary human cholangiocytes and mesenchymal stem cells fail to rescue mice with acute**  
 4 **cholangiopathy following transplantation.** (A) Kaplan-Meier curve of mice with MDA-induced  
 5 cholangiopathy receiving directly isolated human primary gallbladder cholangiocytes and human  
 6 mesenchymal stem cells (MSCs) vs. carrier medium (carrier) demonstrating no statistically  
 7 significant difference in survival between the three groups;  $P > 0.05$ , log-rank test. (B) Serum  
 8 biochemistry at the end of the experiment demonstrating persistent cholestasis in animals receiving  
 9 primary gallbladder cholangiocytes, MSCs or carrier medium compared to healthy controls;  
 10  $*P < 0.05$ ,  $***P < 0.001$ ,  $\#P > 0.05$ , one-way ANOVA. (C) Staining for human markers following  
 11 cell transplantation reveals lack of engraftment of MSCs; while primary gallbladder  
 12 cholangiocytes exhibit low level engraftment, which was not adequate to repair the damaged bile

1 duct epithelium (white arrowheads). Engrafted primary gallbladder cholangiocytes lose  
2 gallbladder markers and upregulate intrahepatic markers. Scale bars; white, 100µm; yellow, 10  
3 µm.

Supplementary Figure 14

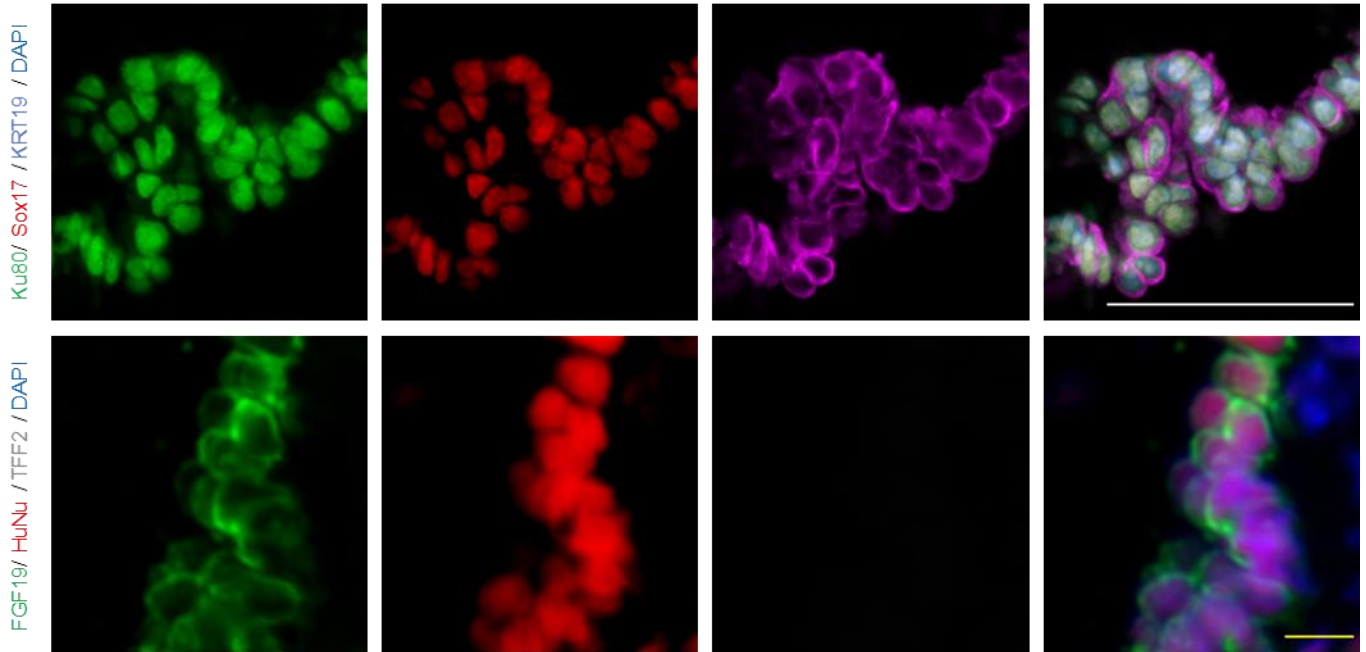

1  
2 **Fig. S14.**  
3 **Transplantation of human common bile duct organoids in mouse gallbladder.**  
4 Immunofluorescence analysis demonstrating expression of gallbladder markers and loss of  
5 common bile duct markers following transplantation of cholangiocyte organoids derived from  
6 human common bile duct in the gallbladder of immunocompromised mice. Scale bars; white,  
7 100 $\mu$ m; yellow, 10 $\mu$ m.  
8

1 Supplementary Figure 15

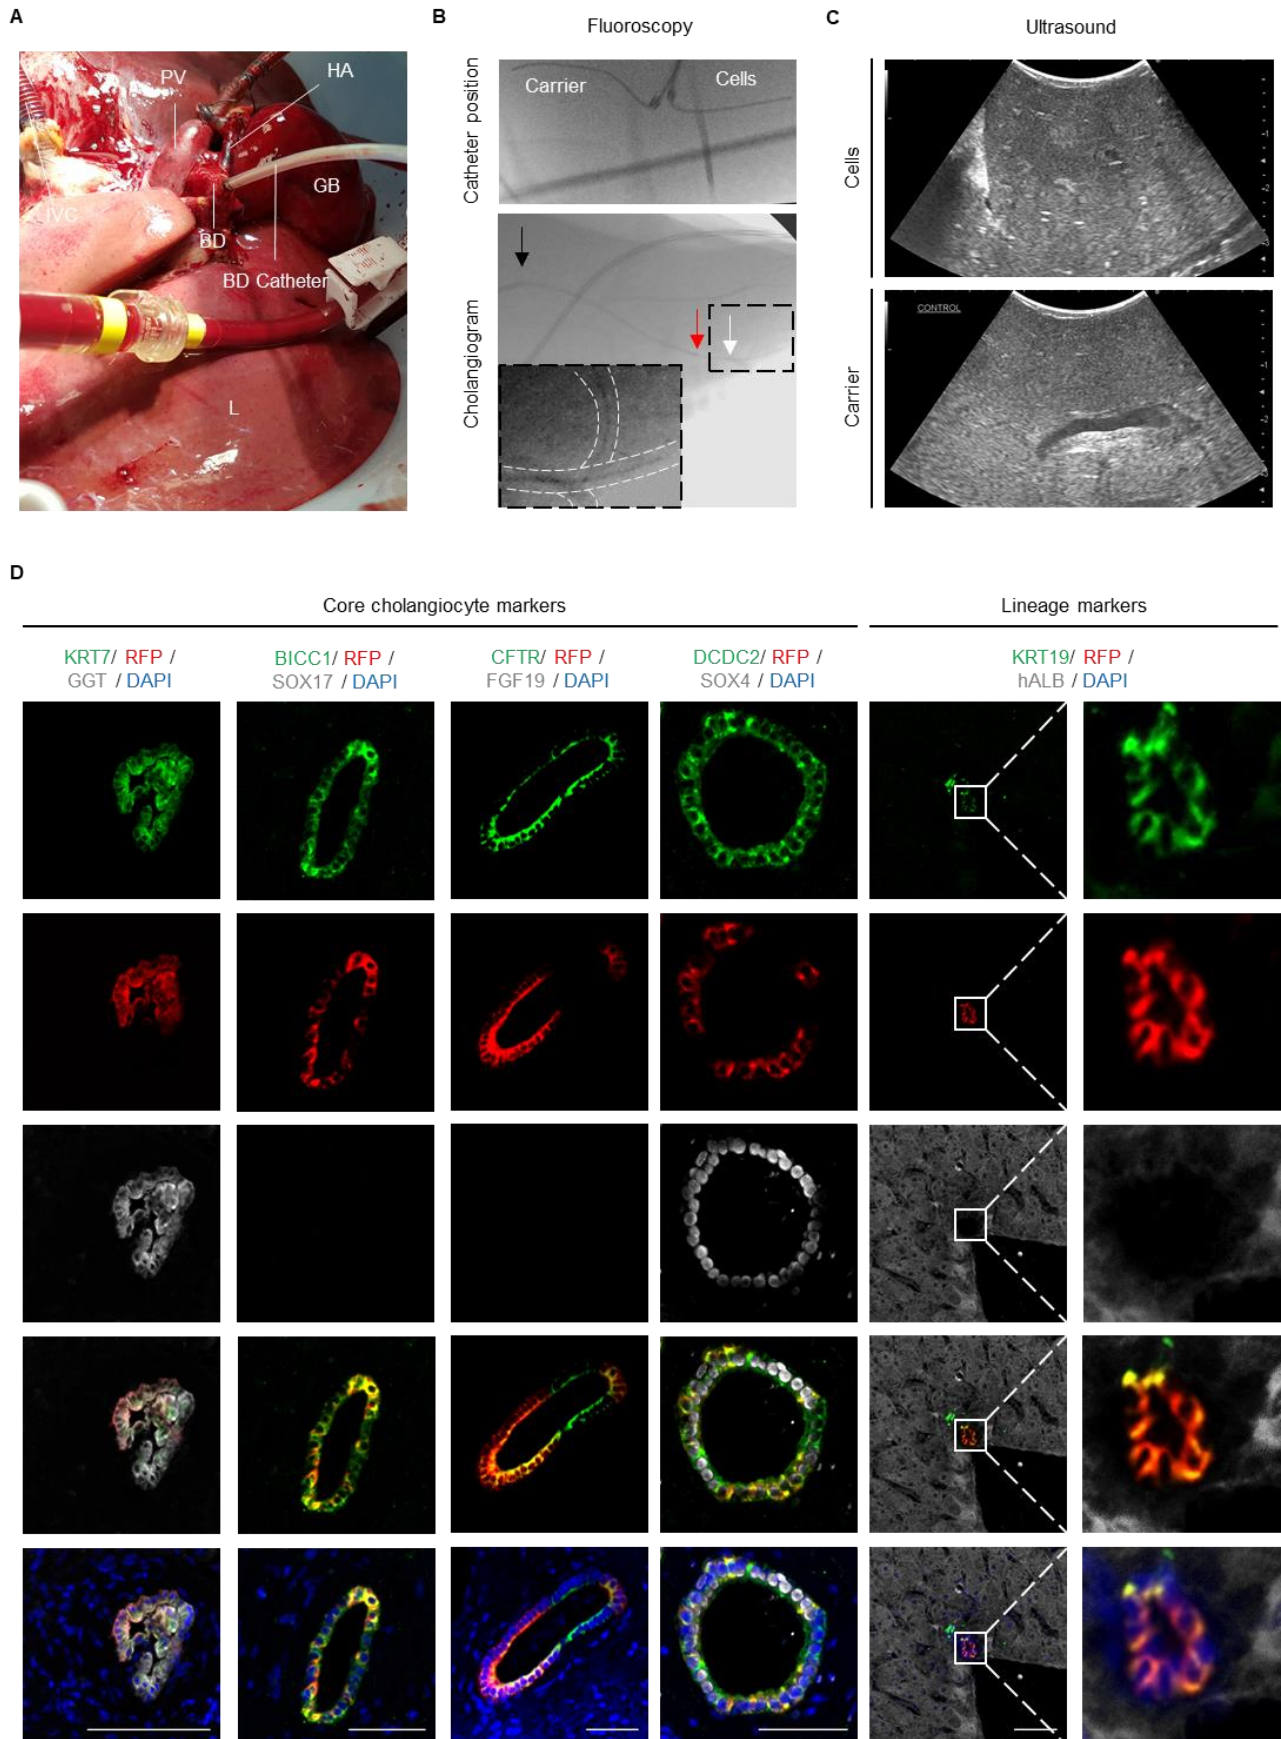



1 **Fig. S15.**  
2 **Administration of gallbladder organoids in human livers receiving Normothermic Perfusion**  
3 **(NMP). (A)** Photograph of a human liver on NMP demonstrating anatomical landmarks, as well  
4 as the bile duct catheter used for administration of the Red Fluorescent Protein (RFP) expressing  
5 organoids. PV, portal vein; IVC, inferior vena cava; HA, hepatic artery; BD, Bile duct; GB,  
6 gallbladder; L, Liver. **(B)** Fluoroscopic images of peripheral duct cannulation. The position of the  
7 biliary catheters used for the injection of cells or carrier in the peripheral ducts of liver segments  
8 3 and 5 respectively is shown in the top image. A cholangiogram of segment 3 following catheter  
9 placement, illustrating the peripheral position of the catheter and the area of distribution of injected  
10 the cells is shown in the bottom image. A magnified and contrast enhanced image is provided in  
11 the insert. Black arrow, sheath; red arrow, catheter tip; white arrow, cholangiogram. **(C)**  
12 Ultrasound imaging of the injected area of the liver revealing no duct dilation or any other  
13 abnormality at the end of the experiment. **(D)** Immunofluorescence analysis demonstrating  
14 engraftment, expression of key biliary markers, loss of gallbladder markers, expression of  
15 intrahepatic markers and loss of markers of other lineages in human Red Fluorescent Protein (RFP)  
16 expressing cells following transplantation in NMP human livers. Scale bars, 50µm. The images  
17 are complementary to **Fig. 4.**  
18

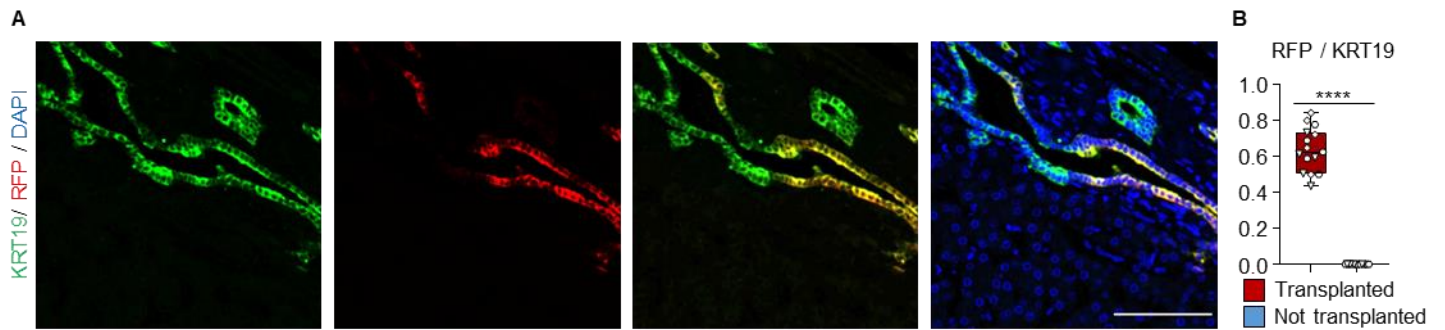

1  
2 **Fig. S16**  
3 **Engraftment of gallbladder organoids in human livers receiving Normothermic Perfusion**  
4 **(NMP).** (A) Immunofluorescence analysis demonstrating engraftment of human Red Fluorescent  
5 Protein (RFP) expressing cells following transplantation in NMP human livers. Scale bars, 100 $\mu$ m.  
6 The images are complementary to **Fig. 4, S15.** (B) Quantification of gallbladder-derived RFP-  
7 expressing cells in injected vs. not injected human bile ducts; \*\*\*\*  $P < 0.0001$ , Mann-Whitney test.  
8 The data corresponds to 3 different livers and 5 random sections per liver. Each section is  
9 represented by a data point, while each organ is represented by a different symbol.

10

1 **Table S1.**

2 Table of the number of animals at risk corresponding to the Kaplan-Meier curve in **Fig. 3B.**

3

4

| Days | Number of animals at risk |                |
|------|---------------------------|----------------|
|      | <i>Organoids</i>          | <i>Carrier</i> |
| 0    | 5                         | 5              |
| 5    | 5                         | 5              |
| 8    | 5                         | 4              |
| 16   | 5                         | 3              |
| 17   | 5                         | 2              |
| 18   | 5                         | 1              |
| 59   | 5                         | 0              |
| 92   | 4                         | 0              |

5

6

1 **Table S2.**  
 2 Table of antibodies used.  
 3

| <b>Antibody</b>                                            | <b>Provider</b> | <b>Catalogue number</b> | <b>Dilution</b> | <b>Species</b> |
|------------------------------------------------------------|-----------------|-------------------------|-----------------|----------------|
| Anti-FGF19                                                 | Santa Cruz      | sc-390621               | 1:100           | Mouse          |
| Anti-FGF19                                                 | Abcam           | ab225942                | 1:100           | Rabbit         |
| Anti-TFF2                                                  | R&D systems     | MAB4077                 | 1:50            | Mouse          |
| Anti-DCDC2                                                 | Santa Cruz      | sc-166051               | 1:100           | Mouse          |
| Anti-human albumin                                         | R&D systems     | MAB1455                 | 1:50            | Mouse          |
| Anti-SOX4                                                  | Abcam           | ab86809                 | 1:50            | Rabbit         |
| Anti-SOX17                                                 | R&D systems     | AF1924                  | 1:100           | Goat           |
| Anti-RFP                                                   | Abcam           | ab62341                 | 1:100           | Rabbit         |
| Anti-RFP                                                   | Rockland        | 200-101-379             | 1:200           | Goat           |
| Anti-KRT19                                                 | DSHB            | TROMA III               | 1:100           | Rat            |
| Anti-KRT19                                                 | Abcam           | ab7754                  | 1:100           | Mouse          |
| Anti-KRT19                                                 | Abcam           | ab52625                 | 1:100           | Rabbit         |
| Anti-KRT7                                                  | DAKO            | GA61961-2               | 1:100           | Mouse          |
| Anti-KRT7                                                  | Abcam           | ab68459                 | 1:100           | Rabbit         |
| Anti- $\alpha$ SMA                                         | DAKO            | GA61161-2               | 1:100           | Mouse          |
| HNF1B (c-20)                                               | SANTA CRUZ      | sc-7411                 | 1:100           | Goat           |
| GAMMA-GLUTAMYL TRANSPEPTIDASE (GGT)                        | Abcam           | ab55138                 | 1:100           | Mouse          |
| CYSTIC FIBROSIS TRANSMEMBRANE CONDUCTANCE REGULATOR (CFTR) | SANTA CRUZ      | sc-10747                | 1:100           | Rabbit         |
| ALEXA FLUOR DONKEY ANTI-Rabbit 568                         | A10042          | INVITROGEN              | 1:1000          | Donkey         |
| ALEXA FLUOR DONKEY ANTI-Rabbit 488                         | A21206          | INVITROGEN              | 1:1000          | Donkey         |
| ALEXA FLUOR DONKEY ANTI-Rabbit 647                         | A31573          | INVITROGEN              | 1:1000          | Donkey         |
| ALEXA FLUOR DONKEY ANTI-goat 568                           | A11057          | INVITROGEN              | 1:1000          | Donkey         |
| ALEXA FLUOR DONKEY ANTI-goat 488                           | A11055          | INVITROGEN              | 1:1000          | Donkey         |
| ALEXA FLUOR DONKEY ANTI-goat 647                           | A21447          | INVITROGEN              | 1:1000          | Donkey         |
| ALEXA FLUOR DONKEY ANTI-mouse 568                          | A10037          | INVITROGEN              | 1:1000          | Donkey         |
| ALEXA FLUOR DONKEY ANTI-mouse 488                          | A21202          | INVITROGEN              | 1:1000          | Donkey         |
| ALEXA FLUOR DONKEY ANTI-mouse 647                          | A31571          | INVITROGEN              | 1:1000          | Donkey         |

4  
 5

1 **Table S3**  
 2 Table of QPCR primers used.

3  
 4

| <b>Gene</b> | <b>Primer sequence (5' à 3')</b> |
|-------------|----------------------------------|
| HNF1B       | F TCACAGATACCAGCAGCATCAGT        |
|             | R GGCATCACCAGGCTTGTA             |
| PBGD        | F GGAGCCATGTCTGGTAACGG           |
|             | R CCACGCGAATCACTCTCATCT          |
| SOX9        | F CTCTGGAGACTTCTGAACGAGAG        |
|             | R CCTTGAAGATGGCGTTGGGG           |
| CK19        | F ACGACCATCCAGGACCTGCGG          |
|             | R TCCCACTTGGCCCCTCAGCGTA         |
| CK7         | F GATTGCTGGCCTTCGGGGT            |
|             | R TCATCACAGAGATATTCACGGCTC       |
| GGT         | F GTGAGAGCAGTTGGCTGTGC           |
|             | R GTTGA ACTCTGCTGTGGGGC          |
| CFTR        | F AGTTGCAGATGAGGTTGGGC           |
|             | R AAAGAGCTTCACCCTGTCCG           |
| SOX4        | F AGCGACAAGATCCCTTTCATTC         |
|             | R CGTTGCCGGACTTCACCTT            |
| TFF2        | F CCCATAACAGGACGAACTGC           |
|             | R GCACTGATCCGACTCTTGCT           |
| SOX17       | F CGCACGGAATTTGAACAGTA           |
|             | R GGATCAGGGACCTGTCACAC           |
| FGF19       | F ATGCAGGGGCTGCTTCAGTA           |
|             | R AGCCATCTGGGCGGATCT             |

5  
 6

1 **Movie S1.**

2 T1 weighted Magnetic Resonance Imaging (MRI) of a control mouse, receiving MDA followed  
3 by injection of carrier medium without organoids in the biliary tree.  
4

5 **Movie S2.**

6 T2 weighted MRI/ Magnetic Resonance CholangioPancreatography (MRCP) of a control mouse  
7 receiving MDA followed by injection of carrier medium without organoids in the biliary tree  
8 demonstrating the presence of cholangiopathy. The MRCP sequence corresponds to the  
9 reconstructed MRCP image in Fig. 3C (not transplanted panel).  
10

11 **Movie S3.**

12 T1 weighted Magnetic Resonance Imaging (MRI) of a mouse receiving MDA followed by  
13 injection of organoids in the biliary tree. The images were acquired 90 days after the injection of  
14 organoids demonstrating normal liver anatomy with no formation of tumors.  
15

16 **Movie S4.**

17 T2 weighted MRI/ Magnetic Resonance CholangioPancreatography (MRCP) of a mouse receiving  
18 MDA followed by injection of organoids in the biliary tree demonstrating resolution of  
19 cholangiopathy. The MRCP sequence corresponds to the reconstructed MRCP image in **Fig. 3C**  
20 (transplanted panel).  
21

22 **Movie S5**

23 MRI-based 3D reconstruction of the biliary tree of a control mouse receiving MDA followed by  
24 injection of carrier medium without organoids in the biliary tree demonstrating the presence of  
25 cholangiopathy with loss of bile duct signal. The bile ducts were reconstructed from T2 weighted  
26 MR images.  
27

28 **Movie S6**

29 MRI-based 3D reconstruction of the biliary tree of a mouse receiving MDA followed by injection  
30 of organoids in the biliary tree demonstrating resolution of cholangiopathy. The bile ducts were  
31 reconstructed from T2 weighted MR images.  
32

33 **Movie S7**

34 Z-stack of native and regenerated RFP-expressing bile ducts in the liver of an animal receiving  
35 MDA followed by injection of RFP-expressing human gallbladder organoids in the biliary tree.  
36 KRT19 is shown in green. RFP is shown in red. The movie is complementary to **movies S8** and  
37 **S9**.  
38

39 **Movie S8**

40 3D reconstruction illustrating native and regenerated bile ducts in the liver of an animal receiving  
41 MDA followed by injection of RFP-expressing human gallbladder organoids in the biliary tree.  
42 Native ducts, KRT19 positive/ RFP negative; regenerated ducts, KRT19 positive/ RFP positive.  
43 The bile ducts were reconstructed from the RFP and KRT19 immunofluorescence images used to

1 generate **movie S7**. KRT19 is shown in green, RFP is shown in red. The movie is complementary  
2 to **movies S7** and **S9**.

3

4 **Movie S9**

5 3D rendering illustrating native and regenerated bile ducts in the liver of an animal receiving MDA  
6 followed by injection of RFP-expressing human gallbladder organoids in the biliary tree. Native  
7 ducts, KRT19 positive/ RFP negative; regenerated ducts, KRT19 positive/ RFP positive. The bile  
8 ducts were reconstructed from the RFP and KRT19 immunofluorescence images used to generate  
9 **movie S7** and **S8**. KRT19 is shown in green, RFP is shown in red. The movie is complementary  
10 to **movies S7** and **S8**.

11

12 **Data S1. (separate file)**

13 Table of differentially expressed genes between different regions of the biliary tree. IHD,  
14 Intrahepatic ducts; CBD, Common Bile Duct; GB, Gallbladder. The table corresponds to genes  
15 with a log2 fold change > 1 and an adjusted *P* value < 0.001.

16

17 **Data S2. (separate file)**

18 Table of differentially expressed genes in pseudotime in primary cholangiocytes with an adjusted  
19 *P* value < 0.001.

20

21 **Data S3. (separate file)**

22 Table of differentially expressed genes upregulated in organoids or organoids treated with bile  
23 versus primary cholangiocytes. ORG, organoids; ORGT, Bile treated organoids. The table  
24 corresponds to genes with a log2 fold change > 1 and an adjusted *P* value < 0.001.

## References and notes

1. J. Drost, H. Clevers, Translational applications of adult stem cell-derived organoids. *Development* **144**, 968–975 (2017). [doi:10.1242/dev.140566](https://doi.org/10.1242/dev.140566) [Medline](#)
2. R. H. Squires, V. Ng, R. Romero, U. Ekong, W. Hardikar, S. Emre, G. V. Mazariegos, Evaluation of the pediatric patient for liver transplantation: 2014 practice guideline by the American Association for the Study of Liver Diseases, American Society of Transplantation and the North American Society for Pediatric Gastroenterology, Hepatology and Nutrition. *Hepatology* **60**, 362–398 (2014). [doi:10.1002/hep.27191](https://doi.org/10.1002/hep.27191) [Medline](#)
3. F. Sampaziotis, A. W. Justin, O. C. Tysoe, S. Sawiak, E. M. Godfrey, S. S. Upponi, R. L. Gieseck 3rd, M. C. de Brito, N. L. Berntsen, M. J. Gómez-Vázquez, D. Ortmann, L. Yiangou, A. Ross, J. Bargehr, A. Bertero, M. C. F. Zonneveld, M. T. Pedersen, M. Pawlowski, L. Valestrand, P. Madrigal, N. Georgakopoulos, N. Pirmadjid, G. M. Skeldon, J. Casey, W. Shu, P. M. Materek, K. E. Snijders, S. E. Brown, C. A. Rimland, I. Simonic, S. E. Davies, K. B. Jensen, M. Zilbauer, W. T. H. Gelson, G. J. Alexander, S. Sinha, N. R. F. Hannan, T. A. Wynn, T. H. Karlsen, E. Melum, A. E. Markaki, K. Saeb-Parsy, L. Vallier, Reconstruction of the mouse extrahepatic biliary tree using primary human extrahepatic cholangiocyte organoids. *Nat. Med.* **23**, 954–963 (2017). [doi:10.1038/nm.4360](https://doi.org/10.1038/nm.4360) [Medline](#)
4. K. Parikh, A. Antanaviciute, D. Fawkner-Corbett, M. Jagielowicz, A. Aulicino, C. Lagerholm, S. Davis, J. Kinchen, H. H. Chen, N. K. Alham, N. Ashley, E. Johnson, P. Hublitz, L. Bao, J. Lukomska, R. S. Andev, E. Björklund, B. M. Kessler, R. Fischer, R. Goldin, H. Koohy, A. Simmons, Colonic epithelial cell diversity in health and inflammatory bowel disease. *Nature* **567**, 49–55 (2019). [doi:10.1038/s41586-019-0992-y](https://doi.org/10.1038/s41586-019-0992-y) [Medline](#)
5. C. A. Rimland, S. G. Tilson, C. M. Morell, R. A. Tomaz, W.-Y. Lu, S. E. Adams, N. Georgakopoulos, F. Otaizo-Carrasquero, T. G. Myers, J. R. Ferdinand, R. L. Gieseck 3rd, F. Sampaziotis, O. C. Tysoe, B. Wesley, D. Muraro, G. C. Oniscu, N. R. Hannan, S. J. Forbes, K. Saeb-Parsy, T. A. Wynn, L. Vallier, Regional differences in human biliary tissues and corresponding *in vitro* derived organoids. *Hepatology* **10.1002/hep.31252** (2020). [doi:10.1002/hep.31252](https://doi.org/10.1002/hep.31252) [Medline](#)
6. J. H. Tabibian, A. I. Masyuk, T. V. Masyuk, S. P. O'Hara, N. F. LaRusso, Physiology of cholangiocytes. *Compr. Physiol.* **3**, 541–565 (2013). [doi:10.1002/cphy.c120019](https://doi.org/10.1002/cphy.c120019) [Medline](#)
7. A. I. Masyuk, N. F. LaRusso, Aquaporins in the hepatobiliary system. *Hepatology* **43**, S75–S81 (2006). [doi:10.1002/hep.20996](https://doi.org/10.1002/hep.20996) [Medline](#)
8. K.-S. Yoo, H. S. Choi, D. W. Jun, H. L. Lee, O. Y. Lee, B. C. Yoon, K. G. Lee, S. S. Paik, Y. S. Kim, J. Lee, MUC Expression in Gallbladder Epithelial Tissues in Cholesterol-Associated Gallbladder Disease. *Gut Liver* **10**, 851–858 (2016). [doi:10.5009/gnl15600](https://doi.org/10.5009/gnl15600) [Medline](#)
9. S. J. L. B. Zweers, K. A. C. Booiij, M. Komuta, T. Roskams, D. J. Gouma, P. L. M. Jansen, F. G. Schaap, The human gallbladder secretes fibroblast growth factor 19 into bile: Towards defining the role of fibroblast growth factor 19 in the enterobiliary tract. *Hepatology* **55**, 575–583 (2012). [doi:10.1002/hep.24702](https://doi.org/10.1002/hep.24702) [Medline](#)



10. Y. Zong, B. Z. Stanger, Molecular mechanisms of bile duct development. *Int. J. Biochem. Cell Biol.* **43**, 257–264 (2011). [doi:10.1016/j.biocel.2010.06.020](https://doi.org/10.1016/j.biocel.2010.06.020) [Medline](#)
11. K. Si-Tayeb, F. P. Lemaigre, S. A. Duncan, Organogenesis and development of the liver. *Dev. Cell* **18**, 175–189 (2010). [doi:10.1016/j.devcel.2010.01.011](https://doi.org/10.1016/j.devcel.2010.01.011) [Medline](#)
12. N. Aizarani, A. Saviano, L. Sagar, L. Maily, S. Durand, J. S. Herman, P. Pessaux, T. F. Baumert, D. Grün, A human liver cell atlas reveals heterogeneity and epithelial progenitors. *Nature* **572**, 199–204 (2019). [doi:10.1038/s41586-019-1373-2](https://doi.org/10.1038/s41586-019-1373-2) [Medline](#)
13. B. J. Pepe-Mooney, M. T. Dill, A. Alemany, J. Ordovas-Montanes, Y. Matsushita, A. Rao, A. Sen, M. Miyazaki, S. Anakk, P. A. Dawson, N. Ono, A. K. Shalek, A. van Oudenaarden, F. D. Camargo, Single-Cell Analysis of the Liver Epithelium Reveals Dynamic Heterogeneity and an Essential Role for YAP in Homeostasis and Regeneration. *Cell Stem Cell* **25**, 23–38.e8 (2019). [doi:10.1016/j.stem.2019.04.004](https://doi.org/10.1016/j.stem.2019.04.004) [Medline](#)
14. L. Planas-Paz, T. Sun, M. Pikiolk, N. R. Cochran, S. Bergling, V. Orsini, Z. Yang, F. Sigoillot, J. Jetzer, M. Syed, M. Neri, S. Schuierer, L. Morelli, P. S. Hoppe, W. Schwarzer, C. M. Cobos, J. L. Alford, L. Zhang, R. Cuttat, A. Waldt, N. Carballido-Perrig, F. Nigsch, B. Kinzel, T. B. Nicholson, Y. Yang, X. Mao, L. M. Terracciano, C. Russ, J. S. Reece-Hoyes, C. Gubser Keller, A. W. Sailer, T. Bouwmeester, L. E. Greenbaum, J. J. Lugus, F. Cong, G. McAllister, G. R. Hoffman, G. Roma, J. S. Tchorz, YAP, but Not RSPO-LGR4/5, Signaling in Biliary Epithelial Cells Promotes a Ductular Reaction in Response to Liver Injury. *Cell Stem Cell* **25**, 39–53.e10 (2019). [doi:10.1016/j.stem.2019.04.005](https://doi.org/10.1016/j.stem.2019.04.005) [Medline](#)
15. A. Lanzini, in *Encyclopedia of Food Sciences and Nutrition*, B. Caballero, Ed. (Academic Press, ed. 2, 2003), pp. 471–478.
16. O. C. Tysoe, A. W. Justin, T. Brevini, S. E. Chen, K. T. Mahbubani, A. K. Frank, H. Zedira, E. Melum, K. Saeb-Parsy, A. E. Markaki, L. Vallier, F. Sampaziotis, Isolation and propagation of primary human cholangiocyte organoids for the generation of bioengineered biliary tissue. *Nat. Protoc.* **14**, 1884–1925 (2019). [doi:10.1038/s41596-019-0168-0](https://doi.org/10.1038/s41596-019-0168-0) [Medline](#)
17. S.-B. Kwon, J.-S. Park, J.-Y. Yi, J.-W. Hwang, M. Kim, M.-O. Lee, B.-H. Lee, H.-L. Kim, J. H. Kim, H. Chung, G. Kong, K.-S. Kang, B.-I. Yoon, Time- and dose-based gene expression profiles produced by a bile-duct-damaging chemical, 4,4'-methylene dianiline, in mouse liver in an acute phase. *Toxicol. Pathol.* **36**, 660–673 (2008). [doi:10.1177/0192623308320272](https://doi.org/10.1177/0192623308320272) [Medline](#)
18. N. L. Berntsen, B. Fosby, L. Valestrand, C. Tan, H. M. Reims, E. Schruppf, T. H. Karlsen, P. D. Line, E. Melum, Establishment of a surgical bile duct injection technique giving direct access to the bile ducts for studies of the murine biliary tree. *Am. J. Physiol. Gastrointest. Liver Physiol.* **314**, G349–G359 (2018). [doi:10.1152/ajpgi.00124.2017](https://doi.org/10.1152/ajpgi.00124.2017) [Medline](#)
19. C. Arber, M. K. Brenner, P. Reddy, Mouse models in bone marrow transplantation and adoptive cellular therapy. *Semin. Hematol.* **50**, 131–144 (2013). [doi:10.1053/j.seminhematol.2013.03.026](https://doi.org/10.1053/j.seminhematol.2013.03.026) [Medline](#)
20. D. Nasralla, C. C. Coussios, H. Mergental, M. Z. Akhtar, A. J. Butler, C. D. L. Ceresa, V. Chiochia, S. J. Dutton, J. C. García-Valdecasas, N. Heaton, C. Imber, W. Jassem, I. Jochmans, J. Karani, S. R. Knight, P. Kocabayoglu, M. Malagò, D. Mirza, P. J. Morris, A. Pallan, A. Paul, M. Pavel, M. T. P. R. Perera, J. Pirenne, R. Ravikumar, L.

- Russell, S. Upponi, C. J. E. Watson, A. Weissenbacher, R. J. Ploeg, P. J. Friend, Consortium for Organ Preservation in Europe, A randomized trial of normothermic preservation in liver transplantation. *Nature* **557**, 50–56 (2018). [doi:10.1038/s41586-018-0047-9](https://doi.org/10.1038/s41586-018-0047-9) [Medline](#)
21. A. I. Skaro, C. L. Jay, T. B. Baker, E. Wang, S. Pasricha, V. Lyuksemburg, J. A. Martin, J. M. Feinglass, L. B. Preczewski, M. M. Abecassis, The impact of ischemic cholangiopathy in liver transplantation using donors after cardiac death: The untold story. *Surgery* **146**, 543–553 (2009). [doi:10.1016/j.surg.2009.06.052](https://doi.org/10.1016/j.surg.2009.06.052) [Medline](#)
  22. C. K. Enestvedt, S. Malik, P. P. Reese, A. Maskin, P. S. Yoo, S. A. Fayek, P. Abt, K. M. Olthoff, A. Shaked, Biliary complications adversely affect patient and graft survival after liver retransplantation. *Liver Transpl.* **19**, 965–972 (2013). [doi:10.1002/lt.23696](https://doi.org/10.1002/lt.23696) [Medline](#)
  23. C. J. E. Watson, V. Kosmoliaptsis, C. Pley, L. Randle, C. Fear, K. Crick, A. E. Gimson, M. Allison, S. Upponi, R. Brais, I. Jochmans, A. J. Butler, Observations on the ex situ perfusion of livers for transplantation. *Am. J. Transplant.* **18**, 2005–2020 (2018). [doi:10.1111/ajt.14687](https://doi.org/10.1111/ajt.14687) [Medline](#)
  24. R. G. Farmer, W. A. Hawk, R. B. Turnbull Jr., Clinical patterns in Crohn's disease: A statistical study of 615 cases. *Gastroenterology* **68**, 627–635 (1975). [Medline](#)
  25. S. A. MacParland, J. C. Liu, X. Z. Ma, B. T. Innes, A. M. Bartczak, B. K. Gage, J. Manuel, N. Khoo, J. Echeverri, I. Linares, R. Gupta, M. L. Cheng, L. Y. Liu, D. Camat, S. W. Chung, R. K. Seliga, Z. Shao, E. Lee, S. Ogawa, M. Ogawa, M. D. Wilson, J. E. Fish, M. Selzner, A. Ghanekar, D. Grant, P. Greig, G. Sapisochin, N. Selzner, N. Winegarden, O. Adeyi, G. Keller, G. D. Bader, I. D. McGilvray, Single cell RNA sequencing of human liver reveals distinct intrahepatic macrophage populations. *Nat. Commun.* **9**, 4383 (2018). [doi:10.1038/s41467-018-06318-7](https://doi.org/10.1038/s41467-018-06318-7) [Medline](#)
  26. D. J. McCarthy, K. R. Campbell, A. T. L. Lun, Q. F. Wills, Scater: Pre-processing, quality control, normalization and visualization of single-cell RNA-seq data in R. *Bioinformatics* **33**, 1179–1186 (2017). [doi:10.1093/bioinformatics/btw777](https://doi.org/10.1093/bioinformatics/btw777) [Medline](#)
  27. A. Butler, P. Hoffman, P. Smibert, E. Papalexi, R. Satija, Integrating single-cell transcriptomic data across different conditions, technologies, and species. *Nat. Biotechnol.* **36**, 411–420 (2018). [doi:10.1038/nbt.4096](https://doi.org/10.1038/nbt.4096) [Medline](#)
  28. L. Haghverdi, A. T. L. Lun, M. D. Morgan, J. C. Marioni, Batch effects in single-cell RNA-sequencing data are corrected by matching mutual nearest neighbors. *Nat. Biotechnol.* **36**, 421–427 (2018). [doi:10.1038/nbt.4091](https://doi.org/10.1038/nbt.4091) [Medline](#)
  29. F. A. Wolf, P. Angerer, F. J. Theis, SCANPY: Large-scale single-cell gene expression data analysis. *Genome Biol.* **19**, 15 (2018). [doi:10.1186/s13059-017-1382-0](https://doi.org/10.1186/s13059-017-1382-0) [Medline](#)
  30. L. Haghverdi, M. Büttner, F. A. Wolf, F. Buettner, F. J. Theis, Diffusion pseudotime robustly reconstructs lineage branching. *Nat. Methods* **13**, 845–848 (2016). [doi:10.1038/nmeth.3971](https://doi.org/10.1038/nmeth.3971) [Medline](#)
  31. X. Qiu, Q. Mao, Y. Tang, L. Wang, R. Chawla, H. A. Pliner, C. Trapnell, Reversed graph embedding resolves complex single-cell trajectories. *Nat. Methods* **14**, 979–982 (2017). [doi:10.1038/nmeth.4402](https://doi.org/10.1038/nmeth.4402) [Medline](#)
  32. V. Y. Kiselev, K. Kirschner, M. T. Schaub, T. Andrews, A. Yiu, T. Chandra, K. N. Natarajan, W. Reik, M. Barahona, A. R. Green, M. Hemberg, SC3: Consensus

- clustering of single-cell RNA-seq data. *Nat. Methods* **14**, 483–486 (2017). [doi:10.1038/nmeth.4236](https://doi.org/10.1038/nmeth.4236) [Medline](#)
33. L. Zappia, A. Oshlack, Clustering trees: A visualization for evaluating clusterings at multiple resolutions. *Gigascience* **7**, giy083 (2018). [doi:10.1093/gigascience/giy083](https://doi.org/10.1093/gigascience/giy083) [Medline](#)
34. A. Subramanian, P. Tamayo, V. K. Mootha, S. Mukherjee, B. L. Ebert, M. A. Gillette, A. Paulovich, S. L. Pomeroy, T. R. Golub, E. S. Lander, J. P. Mesirov, Gene set enrichment analysis: A knowledge-based approach for interpreting genome-wide expression profiles. *Proc. Natl. Acad. Sci. U.S.A.* **102**, 15545–15550 (2005). [doi:10.1073/pnas.0506580102](https://doi.org/10.1073/pnas.0506580102) [Medline](#)
35. M. V. Kuleshov, M. R. Jones, A. D. Rouillard, N. F. Fernandez, Q. Duan, Z. Wang, S. Koplev, S. L. Jenkins, K. M. Jagodnik, A. Lachmann, M. G. McDermott, C. D. Monteiro, G. W. Gundersen, A. Ma'ayan, Enrichr: A comprehensive gene set enrichment analysis web server 2016 update. *Nucleic Acids Res.* **44**, W90–W97 (2016). [doi:10.1093/nar/gkw377](https://doi.org/10.1093/nar/gkw377) [Medline](#)
36. F. Sampaziotis, M. C. de Brito, P. Madrigal, A. Bertero, K. Saeb-Parsy, F. A. C. Soares, E. Schrupf, E. Melum, T. H. Karlsen, J. A. Bradley, W. T. H. Gelson, S. Davies, A. Baker, A. Kaser, G. J. Alexander, N. R. F. Hannan, L. Vallier, Cholangiocytes derived from human induced pluripotent stem cells for disease modeling and drug validation. *Nat. Biotechnol.* **33**, 845–852 (2015). [doi:10.1038/nbt.3275](https://doi.org/10.1038/nbt.3275) [Medline](#)
37. F. Sampaziotis, M. C. de Brito, I. Geti, A. Bertero, N. R. Hannan, L. Vallier, Directed differentiation of human induced pluripotent stem cells into functional cholangiocyte-like cells. *Nat. Protoc.* **12**, 814–827 (2017). [doi:10.1038/nprot.2017.011](https://doi.org/10.1038/nprot.2017.011) [Medline](#)
38. R. Ravikumar, W. Jassem, H. Mergental, N. Heaton, D. Mirza, M. T. P. R. Perera, A. Quaglia, D. Holroyd, T. Vogel, C. C. Coussios, P. J. Friend, Liver Transplantation After Ex Vivo Normothermic Machine Preservation: A Phase 1 (First-in-Man) Clinical Trial. *Am. J. Transplant.* **16**, 1779–1787 (2016). [doi:10.1111/ajt.13708](https://doi.org/10.1111/ajt.13708) [Medline](#)
